1 **IL-17 signalling is critical for controlling subcutaneous adipose tissue dynamics and**  
2 **parasite burden during chronic *Trypanosoma brucei* infection**

3 Matthew C. Sinton<sup>1,2\*</sup>, Praveena Chandrasegaran<sup>1,2</sup>, Paul Capewell<sup>1,2</sup>, Anneli Cooper<sup>1,2</sup>, Alex  
4 Girard<sup>1,2</sup>, John Ogunsola<sup>1,2</sup>, Georgia Perona-Wright<sup>1,3</sup>, Dieudonné M. Ngoyi<sup>4,5</sup>, Nono  
5 Kuispond<sup>4,5</sup>, Bruno Bucheton<sup>5,6</sup>, Mamadou Camara<sup>5,7</sup>, Shingo Kajimura<sup>8,9</sup>, Cécile Bénézech<sup>10</sup>,  
6 Annette MacLeod<sup>1,2,5</sup>, Juan F. Quintana<sup>1,2,11,12\*</sup>

7  
8 <sup>1</sup>Wellcome Centre for Integrative Parasitology, University of Glasgow, Glasgow, UK. <sup>2</sup>School  
9 of Biodiversity, One Health and Veterinary Medicine, University of Glasgow, Glasgow, UK.

10 <sup>3</sup>School of Infection and Immunity, University of Glasgow, Glasgow, UK. <sup>4</sup>Department of  
11 Parasitology, National Institute of Biomedical Research, Kinshasa, Democratic Republic of

12 Congo. <sup>5</sup>Member of TrypanoGEN. <sup>6</sup>Institut de Recherche pour le Développement, Unité Mixte  
13 de Recherche IRD-CIRAD 177, Campus International de Baillarguet, Montpellier, France.

14 <sup>7</sup>Programme National de Lutte contre la Trypanosomiase Humaine Africaine, Ministère de la  
15 Santé, Conakry, Guinea. <sup>8</sup>Division of Endocrinology, Diabetes and Metabolism, Beth Israel

16 Deaconess Medical Center and Harvard Medical School, Boston, Massachusetts, USA.  
17 <sup>9</sup>Howard Hughes Medical Institute, Chevy Chase, Maryland, USA. <sup>10</sup>Centre for Cardiovascular

18 Science, University of Edinburgh, Edinburgh, EH16 4TJ, Scotland, UK. <sup>11</sup>Lydia Becker Institute  
19 of Immunology and Inflammation, University of Manchester, Manchester, UK. <sup>12</sup>Division of

20 Immunology, Immunity to Infection and Health, Manchester Academic Health Science Centre,  
21 University of Manchester, Manchester, UK.

22  
23 \*Correspondence: [matthew.sinton@glasgow.ac.uk](mailto:matthew.sinton@glasgow.ac.uk), [juan.quintana@glasgow.ac.uk](mailto:juan.quintana@glasgow.ac.uk)

24  
25 **Keywords:** *Trypanosoma brucei*, interleukin 17, T<sub>H</sub>17 cells, V $\gamma$ 6<sup>+</sup> T cells, adipose tissue,  
26 adipocytes, interstitial preadipocytes, weight loss

27  
28  
29  
30  
31  
32  
33  
34  
35  
36

37 **Summary**

38 In the skin, *Trypanosoma brucei* colonises the subcutaneous white adipose tissue (scWAT)  
39 and harbours a pool of parasites that are proposed to be competent for forward transmission.  
40 The interaction between parasites, adipose tissue, and the local immune system is likely to  
41 drive the adipose tissue wasting and weight loss observed in cattle and humans infected with  
42 *T. brucei*. However, mechanistically, the events leading to scWAT wasting are not fully  
43 understood. Here, using several complementary approaches, including mass cytometry by  
44 time of flight, bulk and single cell transcriptomics, and *in vivo* genetic models, we found that  
45 *T. brucei* infection drives local expansion of several IL-17A-producing cells in the murine WAT,  
46 including T<sub>H</sub>17 and V $\gamma$ 6<sup>+</sup> T cells. We also found that global IL-17 deficiency, or mice lacking  
47 IL-17 receptor expression exclusively in adipocytes, were protected from infection-induced  
48 WAT wasting and weight loss. Unexpectedly, we found that abrogation of IL-17 signalling in  
49 adipocytes results in a significant accumulation of *Dpp4*<sup>+</sup> *Pi16*<sup>+</sup> interstitial preadipocytes and  
50 a higher burden of extravascular parasites in the WAT, highlighting a critical role for IL-17  
51 signalling in controlling preadipocyte fate, scWAT tissue dynamics, and local parasite burden.  
52 Taken together, our study highlights the central role of adipocyte IL-17 signalling in controlling  
53 WAT responses to infection, suggesting that adipocytes are a critical coordinator of the tissue  
54 dynamics and immune responses to *T. brucei* infection.

55  
56  
57  
58  
59  
60  
61  
62  
63  
64  
65  
66  
67  
68  
69  
70  
71  
72  
73

## 74 Introduction

75 *Trypanosoma brucei* is an extracellular protozoan parasite that infects humans and livestock,  
76 causing Human African Trypanosomiasis (HAT, or sleeping sickness) and Animal African  
77 Trypanosomiasis (AAT, or nagana), respectively<sup>1</sup>. Both HAT and AAT are prevalent in sub-  
78 Saharan regions of the African continent, where they impose a significant socio-economic  
79 burden, and are fatal if left untreated<sup>2</sup>. Chronic infections in both humans and non-primate  
80 mammalian hosts, such as domestic cattle, lead to significant weight loss, a phenomenon that  
81 remains largely unstudied<sup>3</sup>. Upon infection, trypanosomes proliferate and migrate into tissues  
82 throughout the body, where they persist and form extravascular reservoirs in virtually every  
83 organ<sup>4</sup>. One major consequence of infection is weight loss, typically coupled with a reduction  
84 in white adipose tissue (WAT) mass<sup>5</sup>. Previous studies have elegantly demonstrated that mice  
85 lose weight during *T. brucei* infection and that this is associated with loss of gonadal white  
86 adipose tissue (gWAT) mass<sup>6</sup>. The largest cell volume within the gWAT is comprised of  
87 adipocytes, but this tissue is also enriched with multiple immune cell types, including  
88 macrophages, neutrophils, T helper 1 (T<sub>H</sub>1) cells, effector CD8<sup>+</sup> cytotoxic T cells, and B cells<sup>7-  
89 9</sup>, as well as forming a reservoir for *T. brucei*<sup>6</sup>, and different factors released from these  
90 immune cells influence gWAT function under normal physiological conditions. For example,  
91 tumour necrosis factor (TNF) and interleukin-17A (IL-17A) have been shown to regulate  
92 adipose tissue structure and function, by limiting tissue expansion<sup>7</sup>, and inhibiting  
93 adipogenesis<sup>9</sup>, respectively. Furthermore, IL-17A, and signalling through the IL-17C receptor,  
94 have been shown to induce thermogenesis in white and brown adipose tissue,  
95 respectively<sup>10,11</sup>, and activation of thermogenesis, following challenges such as cold exposure,  
96 leads to increased energy expenditure<sup>12</sup>. *T. cruzi* and *T. congolense* infections, the causative  
97 agents of Chagas disease and AAT, respectively, are also associated with elevation of IL-  
98 17A<sup>13,14</sup>, which is important for controlling resistance to infection<sup>14,15</sup>. Together this may  
99 suggest that loss of adipose tissue mass and subsequent weight loss may be driven by local  
100 immune responses, the parasites, or both. However, it remains unclear how the immune  
101 response to *T. brucei* infection influences adipose tissue structure and function.

102 Previous studies from our lab identified the skin as another reservoir for *T. brucei* and  
103 highlighted the presence of parasites in the adjacent subcutaneous white adipose tissue  
104 (scWAT) of infected patients<sup>16</sup>. Furthermore, we recently demonstrated a critical role of  $\gamma\delta$  T  
105 cells (in particular IL-17-producing V $\gamma$ 6<sup>+</sup> T cells) in the control of local skin responses to *T.*  
106 *brucei* infection<sup>17</sup>. However, we were unable to profile the scWAT in detail. Due to its proximity  
107 to the skin, the scWAT may also prove to be an important reservoir for *T. brucei*, giving the  
108 parasites access to a plentiful nutrient supply, whilst simultaneously increasing the chances  
109 of onward transmission. Therefore, we focused on understanding the impact of infection on

110 the structure and function of the inguinal white adipose tissue (iWAT) in mice, which is typically  
111 used to model scWAT in humans<sup>18</sup>. Like gWAT, the iWAT acts as an energy reservoir under  
112 homeostatic conditions and modulates systemic metabolism and appetite<sup>19</sup>, as well as  
113 immune responses<sup>20</sup>. Here we present data demonstrating that *T. brucei* infection is  
114 associated with a broad immune response in the iWAT, including the expansion of IL-17A-  
115 producing T<sub>H</sub>17 and V $\gamma$ 6<sup>+</sup> T cells. Furthermore, we demonstrate that global genetic ablation of  
116 IL-17A/F or targeted deletion of adipocyte IL-17A receptor (*Il17ra*; essential for mediating IL-  
117 17A/F signalling<sup>21</sup>) prevents or limits weight loss and iWAT wasting. Targeted deletion of  
118 adipocyte *Il17ra* also results in an accumulation of small adipocytes in both naïve and infected  
119 mice, with a concomitant accumulation of *Dpp4*<sup>+</sup> *Pi16*<sup>+</sup> interstitial preadipocytes. Interestingly,  
120 targeted deletion of adipocyte *Il17ra* also resulted in an increased burden of extravascular  
121 parasites in the iWAT. These results provide novel insights into the role of IL-17 signalling as  
122 a regulator of adipose tissue structure, function, and dynamics during infection, placing  
123 adipocyte-mediated responses at the core of the local immune responses in the iWAT.  
124 Furthermore, these findings support the utility of *T. brucei* infection models for interrogating  
125 the role that IL-17 signalling plays in controlling adipocyte fate and differentiation, as well as  
126 local and systemic energy balance, in the context of infection.

127

128

129

130

131

132

133

134

135

136

137

138

139

140

141

142

143

144

145

146

147 **Results**

148 ***T. brucei* infection results in reduced iWAT mass and impaired adipose tissue function**  
149 **in a sex-dependent manner**

150 In both humans and livestock, trypanosome infections are known to cause weight loss, and  
151 this has been recapitulated in male mouse models of infection<sup>6</sup>. However, direct comparisons  
152 have not been made between male and female mice to assess whether infection induces  
153 weight loss in a sexually dimorphic manner. To test this, we infected age-matched male and  
154 female C57BL/6 mice for a period of 25 days. We first wanted to determine that mice were  
155 successfully infected and whether there were differences between the levels of circulating  
156 parasites between sexes. Parasitaemia measurements followed a characteristic pattern, with  
157 no significant differences between sexes (**Figure 1A**). There were also no significant  
158 differences in the clinical scores of the mice (**Figure 1B**). Strikingly, during the course of  
159 infection, infected male mice lost significant amounts of bodyweight, whereas there was no  
160 significant difference between the weights of naïve and infected female mice (**Figure 1C** and  
161 **Figure 1D**). Spleen mass increased similarly in both male and female mice (**Supplementary**  
162 **Figure S1**), suggesting that changes in spleen mass during infection do not explain the  
163 differences in the bodyweight of males and females.

164 Weight loss may be explained as a consequence of adipose tissue wasting<sup>22</sup>, as a  
165 consequence of changes in feeding behaviour<sup>23</sup>, or both. To understand this in more detail,  
166 we measured gross food intake as a proxy for feeding behaviour. Over the course of infection,  
167 the food intake of infected male mice decreased from the onset of infection until 11 days post-  
168 infection (dpi), after which it increased to that of naïve males, before dropping again at 25 dpi  
169 (**Figure 1E**). Infected female mice displayed a brief, but non-significant, reduction in food  
170 intake at 7 dpi, but otherwise maintained a similar feeding behaviour profile to their wild type  
171 counterparts (**Figure 1F**). Taken together, these data suggests that weight loss during  
172 experimental trypanosomiasis occurs in a sex-dependent manner and may be associated, in  
173 males, to changes in feeding behaviour.

174 We next explored the impact of *T. brucei* infection on the adipose tissue. In addition to changes  
175 in feeding behaviour<sup>23</sup>, weight loss is typically associated with reductions in adipose tissue  
176 mass<sup>24</sup>. We were particularly interested in the iWAT, which is analogous to the scWAT tissue  
177 in humans, as this constitutes an important parasite niche for disease transmission, especially  
178 in asymptomatic carriers<sup>16</sup>. Previous reports have shown that colonisation of the gonadal white  
179 adipose tissue (gWAT) is associated with weight loss and reduction in adipose mass<sup>6</sup>, but the  
180 effect on iWAT, which is anatomically and functionally distinct from gWAT (**Figure 2A**), was  
181 not investigated. We first determined the presence of parasites in the iWAT and gWAT by  
182 histological analysis (**Figure 2B**) and, as expected, detected trypanosomes in both tissues.  
183 Next, we quantified trypanosome genomic DNA in the iWAT and gWAT as a proxy for

184 determining parasite density. We found that in male mice there were fewer parasites in the  
185 iWAT compared with the gWAT, but that there were no differences between these depots in  
186 females (**Figure 2C**). Our data are consistent with previous reports<sup>6</sup>, and highlights that the  
187 iWAT also harbours a population of parasites that, given their proximity to the skin, are  
188 important for forward parasite transmission<sup>16</sup>.

189 Following our observations of weight loss and the presence of trypanosomes in the iWAT, we  
190 then proceeded to characterise the impact of infection on this adipose tissue depot. When  
191 normalised to bodyweight, we found that infection led to a significant reduction in the iWAT  
192 mass of male mice (**Figure 2D**). Female mice also experienced a reduction in iWAT mass,  
193 but this was not significant. This raised the question of whether the reduction in mass is due  
194 to a loss of lipid content and reduction in adipocyte size (hypotrophy). To address this, we  
195 performed Haematoxylin and Eosin (H&E) staining of iWAT at 25 dpi. We found that the iWAT  
196 of males and female mice infected with *T. brucei* undergoes hypotrophy, with concurrent  
197 infiltration of immune cells (**Figure 2E**). Furthermore, we found a differential effect on the  
198 morphometric properties of the iWAT adipocytes in response to *T. brucei* infection. In infected  
199 male mice, there was a significant decrease in lipid droplet size, with the majority of lipid  
200 droplets ranging from 10-200  $\mu\text{m}^2$ , compared with naïve controls where lipid droplet size was  
201 larger, with the majority of droplets ranging from 51-900  $\mu\text{m}^2$  (**Figure 2F**). In infected female  
202 mice, there was a less dramatic shift in lipid droplet size, with the majority of lipid droplets  
203 ranging from 10-400  $\mu\text{m}^2$ , compared with naïve controls where lipid droplet sizes ranged from  
204 51-1,000  $\mu\text{m}^2$  (**Figure 2G**). The morphometric analyses of iWAT in response to infection are  
205 indicative of tissue wasting. Thus, we questioned whether *T. brucei* infection impacted adipose  
206 tissue function, using systemic glycerol levels as a proxy for adipose tissue function<sup>25</sup>. In both  
207 infected male and female mice, the circulating glycerol levels were significantly reduced  
208 compared to naïve controls (**Figure 2H**), consistent with a global impact of infection on  
209 adipose tissue function. The changes in glycerol levels observed in experimental infections  
210 were also replicated in the serum of stage II HAT patients from the towns of Boffa, Forécariah  
211 and Dubréka in Guinea, suggesting that the adipose tissue dysfunction induced by infection  
212 also occurs in humans (**Figure 2I**). Taken together, these findings highlight that *T. brucei*  
213 infection is associated with significant iWAT wasting and that this, in turn, is associated with  
214 impaired tissue function in both mice and humans.

### 215 ***T. brucei* iWAT colonisation results in a hypometabolic state in the murine iWAT**

216 To better understand the iWAT response to infection, and to identify potential drivers of tissue  
217 wasting, we performed bulk transcriptomic analysis of iWAT harvested at 25 dpi from both  
218 sexes and included naïve controls for comparison. Principal component analysis (PCA)  
219 revealed high levels of variance between naïve and infected males, but less variance between  
220 naïve and infected females (**Figure 3A**), potentially indicating a higher transcriptional

221 response in the iWAT of male mice compared to female mice. Indeed, compared with naïve  
222 controls, differential expression analysis revealed upregulation of 3,828 and 3,177 genes with  
223 a  $\log_2$ Fold change  $>0.5$  and an adjusted  $p$  value ( $padj$ ) of  $<0.01$  in infected male and female  
224 mice, respectively (**Figure 3B; Supplementary Table 1**). In contrast, compared with naïve  
225 controls, this analysis revealed downregulation of 3,332 and 2,606 genes a  $\log_2$ Fold change  
226  $>0.5$  and an  $padj$  of  $<0.01$  in infected male and female mice, respectively (**Figure 3B;**  
227 **Supplementary Table 1**). To explore this dataset further, we performed pathway enrichment  
228 analyses, enriching for Kyoto Encyclopaedia of genes and genomes (KEGG) terms. We first  
229 observed that in both males and females, the majority of upregulated pathways were  
230 associated with immune and inflammatory processes (**Figure 3C and D**). Many genes within  
231 these pathways related to MHC class II antigen presentation (e.g. *H2-DMA*, *H2-DMb1*, *H2-*  
232 *Ob*), inflammatory cytokines (e.g. *Tnf*, *Ifng*, *Il1b*), and complement activation (e.g. *C2*, *C3*,  
233 *C4b*) (**Supplementary Table 2**). When we explored downregulated pathways, we found that  
234 the majority of these were related to metabolism (**Figure 3E and F**), including amino acid  
235 degradation (e.g. *Abat*, *Acat1*, *Acat2*) and propanoate metabolism (e.g. *Sucla2*, *Acox1*, *Acads*)  
236 (**Supplementary Table 2**). Unexpectedly, we also observed that *T. brucei* infection led to a  
237 downregulation of the lipolysis pathway in males and females (**Supplementary Figure S2**),  
238 with canonical genes such as *Pnpla2*, *Fabp4*, and *Lipe* being significantly downregulated  
239 (**Supplementary Figure S2**). Since lipolytic genes were downregulated, we questioned  
240 whether the iWAT was becoming more thermogenic, which could, in turn, lead to a decrease  
241 in mass. However, when exploring our data, we also found that canonical genes associated  
242 with thermogenesis, such as *Ucp1*<sup>26</sup>, were downregulated in infected males and females  
243 (**Supplementary Table 2**). Moreover, expression of genes associated with UCP1-  
244 independent thermogenesis, including *Atp2a1*, *Atp2a2*, and *Atp2a3*<sup>27</sup> were not altered during  
245 infection (**Supplementary Table 2**), suggesting that thermogenesis is not activated in this  
246 context. These results, together with an overall decrease in circulating glycerol levels in serum,  
247 indicate that chronic *T. brucei* infection results in a hypometabolic state in mice (and likely in  
248 humans) to conserve energy<sup>28</sup>.

#### 249 ***T. brucei* iWAT colonisation induces an upregulation of genes associated with T<sub>H</sub>17 T** 250 **cell differentiation**

251 Our transcriptomic analyses also revealed specific enrichment of T cell-related transcripts in  
252 male but not female mice. For example, we found *Cd3d*, *Cd3e*, and *Cd247* were significantly  
253 upregulated in the iWAT of infected male mice but exhibited no changes in infected females  
254 (**Supplementary Table 2**). T<sub>H</sub>1- and T<sub>H</sub>2-related transcripts included *Nfatc1*, *Cd4*, *Runx3*, and  
255 *Gata3*, suggesting that T<sub>H</sub>1 cells may be a significant contributor to interferon gamma (IFN $\gamma$ )  
256 production during infection in the adipose tissue. Additionally, we also detected a significant

257 upregulation of genes associated with differentiation of T<sub>H</sub>17 effector cells, including *Irf4*, *Cd4*,  
258 *Il21r*, and *Il6ra* (**Figure 3G**).

259 Based on our observations, we hypothesised that T<sub>H</sub>17 cells are important for the adipose  
260 immune response to infection. To quantify the different populations of CD4<sup>+</sup> T cells, including  
261 T<sub>H</sub>17 cells, present in the iWAT during chronic *T. brucei* infection, we utilised mass cytometry  
262 by time of flight (CyTOF), enabling us to gain as much information as possible from the wasted  
263 adipose tissue. Consistent with previous studies<sup>8</sup>, we also found an expansion of  
264 macrophages, granulocytes, and dendritic cells in the iWAT of infected males and female mice  
265 (**Figure 4A-4D**). The B cell subset was decreased specifically in male mice during infection  
266 compared to naïve controls, without noticeable changes in female mice (**Figure 4E**).  
267 Regarding the T cell effector population, we observed an increase in the proportion of CD3ε<sup>+</sup>  
268 TCRβ<sup>+</sup> CD4<sup>+</sup> T cells in the iWAT of infected mice (**Figure 4F**) and, in particular, we identified  
269 an expansion of CD44<sup>+</sup> CD69<sup>+</sup> CD4<sup>+</sup> T effector (Teff) cells (**Figure 4G**). Whilst the frequency  
270 of CD4<sup>+</sup> T cells increased in both males and females, the iWAT of infected females contained  
271 a higher proportion of Teff cells compared with males. The expanded Teff cells displayed an  
272 elevated production of interferon gamma (IFNγ; **Figure 4H**), suggesting that some of these  
273 cells are polarised towards a T<sub>H</sub>1 phenotype. Furthermore, there was a significant expansion  
274 of IL-17A-producing Teff cells (**Figure 4I**), consistent with our transcriptomics dataset.  
275 Interestingly, in addition to TNFα and IFNγ, IL-17A was also elevated in the serum of infected  
276 mice and compared to naïve controls (**Figure 4J**), and in second stage HAT patients  
277 compared to healthy controls (**Figure 4K**), demonstrating that IL-17A elevation is conserved  
278 mice and humans infected with *T. brucei*. Taken together, our data demonstrate a significant  
279 expansion of IL-17-producing T cells in the iWAT in response to *T. brucei* infection, and may  
280 be associated with the induction of a hypometabolic state.

### 281 **IL-17A/F is critical for controlling bodyweight and pathology during *T. brucei* infection**

282 Our results so far indicate that chronic iWAT infection leads to an expansion of local T<sub>H</sub>17  
283 effector T cells in male mice. However, the role of IL-17 in the control of *T. brucei* infection, or  
284 in the local infection-induced pathology in the iWAT, has not been explored to date. To test  
285 this, we used a global *Il17a/f* knockout mouse, which is deficient in both IL-17A and IL-17F<sup>29</sup>  
286 (**Figure 5A and Supplementary Figure S3A**). Systemically, we observed that the first peak  
287 of parasitaemia was similar between wildtype and *Il17a/f*<sup>-/-</sup> male mice, with a non-significant  
288 increase in parasitaemia post-day 13 onwards in the *Il17a/f*<sup>-/-</sup> mice (**Figure 5A**), which may  
289 suggest that IL-17A/F plays a role in controlling systemic parasite numbers during chronic  
290 infection. In contrast, the first peak of parasitaemia in *Il17a/f*<sup>-/-</sup> females was lower than in  
291 C57BL/6 mice, and the second peak of parasitaemia was delayed (**Supplementary Figure**  
292 **S3A**). Deficiency of *Il17a/f* was also associated with an earlier onset and increased severity of



293 clinical symptoms in both males (**Figure 5B**) and females (**Supplementary Figure S3B**).  
294 *Il17a<sup>f/-</sup>* male and female mice started to exhibit clinical symptoms (piloerection and hunching)  
295 from 3 and 7 dpi, respectively, whereas wild type mice started to experience these symptoms  
296 between 12 and 15 dpi. Unlike bloodstream parasite numbers, the parasite burden of the major  
297 adipose tissue depots does not appear to be influenced by IL-17A/F in either sex (**Figure 5C**  
298 **and Supplementary Figure S3C and S3D**), indicating that IL-17A/F is dispensable for  
299 controlling systemic of local parasites burden in the adipose tissue.

300 Having established that IL-17A/F signalling is critical for controlling pathology during *T. brucei*  
301 infection, we next examined the role IL-17A/F in controlling local iWAT pathology. For this, we  
302 monitored the weight of both male and female mice during the course of infection. Unlike  
303 C57BL/6 male mice, infected *Il17a<sup>f/-</sup>* males increased their bodyweight (~8-10%) during  
304 infection (**Figure 5D**). Infected female *Il17a<sup>f/-</sup>* mice also gained weight during infection (~8-  
305 19%) in a similar pattern to C57BL/6 females, although similarly to males, IL-17A/F-deficient  
306 females gained more weight than their wild type counterparts (**Supplementary Figure S3E**).  
307 Previous reports have shown that when administered to wild type naïve mice under  
308 homeostatic conditions, IL-17A suppresses food intake<sup>30</sup>. Therefore, given the potential link  
309 between IL-17 signalling, bodyweight, and food intake, we next measured gross food intake  
310 in infected C57BL/6 and *Il17a<sup>f/-</sup>* mice. We observed that up until 9 dpi, wild type and *Il17a<sup>f/-</sup>*  
311 male mice reduced their food intake at the same rate (**Figure 5E**). However, after 11dpi, *Il17a<sup>f/-</sup>*  
312 <sup>f/-</sup> mice started to increase their food intake above that of the wild types. Indeed, food intake  
313 for infected *Il17a<sup>f/-</sup>* mice was higher between 15 and 23 dpi compared with at the onset of  
314 infection. Unlike male mice, food intake was indistinguishable between infected female *Il17a<sup>f/-</sup>*  
315 <sup>f/-</sup> and wild type mice (**Supplementary Figure 3SF**). Together, our results suggest that IL-  
316 17A/F potentially regulates bodyweight by altering food intake in male mice during infection,  
317 but not female mice. Importantly, the weight gain in females was also associated with  
318 increased splenomegaly in *Il17a<sup>f/-</sup>* mice, compared with their wild type counterparts or to male  
319 mice, thus indicating that splenomegaly by itself does not account for the increase in  
320 bodyweight observed in male mice (**Supplementary Figure S3G and S3H**). Related to the  
321 differences in bodyweight, we also found that upon infection, *Il17a<sup>f/-</sup>* knockout male mice also  
322 retained more of their iWAT mass compared with their wild type counterparts (**Figure 5F**),  
323 suggesting that they experienced less wasting. In contrast, although naïve *Il17a<sup>f/-</sup>* female mice  
324 have a higher mass of iWAT than their wild type counterparts, they experience similar levels  
325 of wasting as wild type females upon infection (**Supplementary Figure S3I**), supporting our  
326 hypothesis that the effects of IL-17A/F are sex-dependent.

327 To understand whether global deficiency of *Il17a<sup>f/-</sup>* impacts iWAT lipid content, we performed  
328 H&E staining on the iWAT and measured lipid droplet size in naïve and infected male (**Figure**  
329 **5G - 5I**) and female (**Supplementary Figure S3J to S3L**) mice and compared these with wild

330 type animals. The iWAT adipocyte size was indistinguishable between genotypes in naïve  
331 animals, indicating that IL-17A/F does not affect lipid droplet size under homeostasis.  
332 However, upon infection, *Il17af<sup>-/-</sup>* males retained a higher frequency of larger lipid droplets than  
333 wild type males (**Figure 5I**). When comparing this to female mice, we found that deletion of  
334 *Il17af<sup>-/-</sup>* had no impact on the range of lipid droplet sizes during *T. brucei* infection  
335 (**Supplementary Figure S3L**). Our results demonstrate that IL-17A/F signalling drives iWAT  
336 wasting and lipid usage in adipocytes in males, but not in females, during *T. brucei* infection.

### 337 **Single cell analysis of the iWAT stromal vascular fraction reveals a distinct population** 338 **of IL-17-producing CD27<sup>+</sup> V $\gamma$ 6<sup>+</sup> T cells in the iWAT of infected mice**

339 To further understand the events leading to iWAT wasting in response to *T. brucei* infection,  
340 we conducted single cell RNA on the iWAT, now focusing on male mice since this is where  
341 we observed both upregulation of the IL-17A receptor (**Figure 4L**) and changes in bodyweight  
342 (**Figure 5D**). As we wanted to understand the early processes leading up to the loss of iWAT  
343 tissue mass, we infected mice for 7 days before harvesting the iWAT. Following iWAT  
344 dissociation and scRNAseq analysis, we obtained a total of 46,546 high-quality cells with an  
345 average of 1,296 genes and 20,209 reads per cell (**Supplementary Table 3**). These cells  
346 were broadly classified into 18 clusters (**Figure 6A**) based on common markers associated  
347 with these clusters. The predominant cell type in this dataset was immune cells, with eight B  
348 cell clusters, four T cell clusters, an NK cell cluster, two macrophage clusters, and a  
349 plasmacytoid dendritic cell (pDC) cluster (**Figure 6A**). In addition to the cells within the immune  
350 compartment, we identified two stromal cell clusters comprised of preadipocytes. Of the cell  
351 types we identified, we observed that several expanded in the iWAT of infected mice, including  
352 Tregs, T cell 1, Transitional B cell 4, NK cells, and Macrophage 2, whereas other cell  
353 populations remained similar in numbers between conditions, or contracted in the case of  
354 preadipocytes T cell 2, several B cell clusters, and pDCs (**Figure 6B**). Of the B cells, we  
355 classified four clusters as transitional B cells, based on high expression of *Cd79a*, *Cd79b*, and  
356 *Ighd*, and we classified plasma cells based on these markers with the addition of *Jchain*, *Ighm*,  
357 and *Sdc1* (**Figure 6C**). We also identified a cluster of germinal centre (GC)-like B cells, which  
358 were classified based on expression of *Aicda* and *Pcna*. T cells were classified as CD8<sup>+</sup> T  
359 cells (*Cd3d<sup>+</sup>*, *Cd3e<sup>+</sup>*, *Cd8a<sup>+</sup>*, *Trac<sup>+</sup>*), Tregs (*Cd3d<sup>+</sup>*, *Cd3e<sup>+</sup>*, *Cd4<sup>+</sup>*, *Foxp3<sup>+</sup>*), NK cells (*Cd3d<sup>+</sup>*,  
360 *Cd3e<sup>+</sup>*, *Gzma<sup>+</sup>*, *Gzmb<sup>+</sup>*, *Nkg7<sup>+</sup>*), or T cell 1 and T cell 2 (*Cd3d<sup>+</sup>*, *Cd3e<sup>+</sup>*, *Trac<sup>+</sup>*). The myeloid  
361 compartment was composed of two macrophage subclusters, classified as Macrophage 1  
362 (*Lyz2<sup>+</sup>*, *Fcer1g<sup>+</sup>*, *S100a4<sup>+</sup>*) and Macrophage 2 (*Ccl5<sup>+</sup>*, *S100a4<sup>+</sup>*, *Tmem176a<sup>+</sup>*, *Tmem176b<sup>+</sup>*).  
363 Finally, we classified pDCs based on high expression of *Fcer1g*, *Lgals1*, *Siglech*, and *Runx2*.  
364 Given the prominent role of genes associated with T<sub>H</sub>17 differentiation detected in the iWAT  
365 from infected mice detected by bulk transcriptomics (Figure 3), we next proceeded to resolve  
366 the intrinsic heterogeneity of the T cell subset associated with the iWAT. For this, we subset

367 and reanalysed the T cell compartment separately (**Figure 6D**). This resulted in five T cell  
368 subclusters, which consisted mainly of Tregs (*Cd4*, *Icos*, *Foxp3*), CD8<sup>+</sup> T cells (*Cd8a*, *Cd8b1*),  
369 activated NK cells (*Nkg7*, *Klr1d1*, *Gzma*, *Gzmb*, *Nr4a1*<sup>+</sup>), a cluster of activated and replicative  
370 T cells with evidence of TCR engagement (*Top2a*<sup>+</sup>, *Mki67*<sup>+</sup>, *Hist1h1b*<sup>+</sup>, *Nr4a1*<sup>+</sup>), and IL-17A<sup>+</sup>  
371 V $\gamma$ 6<sup>+</sup> cells (*Tcr $\gamma$ -C1*<sup>+</sup>, *Rorc*<sup>+</sup>, *Cd163l1*<sup>+</sup>, *Il17a*<sup>+</sup>) (**Figure 6E**). To validate the *in silico* prediction  
372 that there is an expansion of IL-17A<sup>+</sup> cells in the murine iWAT in response to infection, we  
373 next measured IL-17A expression using a murine reporter line, in which IL-17A expression is  
374 coupled to GFP expression (IL-17A<sup>GFP</sup>). We observed that at 7 days post-infection, there was  
375 a significant expansion of IL-17A<sup>+</sup> cells (**Figure 6F**), including T<sub>H</sub>17 (CD45<sup>+</sup>, CD3 $\epsilon$ <sup>+</sup>, CD4<sup>+</sup>,  
376 GFP<sup>+</sup>) cells (**Figure 6G**). Although we did not observe a change in the frequency of  $\gamma\delta$  T cells  
377 (**Figure 6H**), consistent with our *in silico* predictions, we observed a significant increase in the  
378 frequency of IL-17A-producing CD27<sup>-</sup>  $\gamma\delta$  T cells (**Figure 6I**) and a concomitant decrease in the  
379 frequency of IFN $\gamma$ -producing CD27<sup>+</sup>  $\gamma\delta$  T cells (**Figure 6J**). Together, these findings  
380 demonstrate a dominant IL-17-driven response in the murine iWAT in response to *T. brucei*  
381 infection. Our data also demonstrate that IL-17A is derived from multiple sources including  
382 local T<sub>H</sub>17 cells and CD27<sup>-</sup> V $\gamma$ 6<sup>+</sup> T cells.

### 383 ***T. brucei* infection results in broad transcriptional changes in iWAT preadipocytes,** 384 **including upregulation of the IL-17A receptor and lipolysis**

385 In addition to detecting a range of IL-17A-producing cells by scRNAseq, we also wanted to  
386 understand which cells may be responding to this cytokine during *T. brucei* infection. To this  
387 end, we measured IL-17A receptor (*Il17ra*) expression across all clusters and found that it was  
388 exclusively upregulated in preadipocytes during infection (**Figure 7A**), indicating that of all the  
389 cells within the iWAT stroma, preadipocytes are likely to be responsive to IL-17A. However,  
390 we were unable to resolve the preadipocyte heterogeneity within the iWAT, or their responses  
391 to infection, so we reclustered these cells and reanalysed them. Using previous reports to  
392 annotate the preadipocytes<sup>31,32</sup>, and after reclustering the population of iWAT preadipocytes  
393 (**Figure 6A**), we identified five distinct populations (**Figure 7B**), four of which expressed  
394 canonical mesenchymal markers including *Ly6a*, *Pdgfra*, and *Cd34* (**Figure 7C**)<sup>32</sup>. These  
395 mesenchymal subclusters encompassed interstitial preadipocytes (*Dpp4*, *Pi16*, *Bmp7*),  
396 located in the interstitium, which are known to be poised to migrate into the iWAT to  
397 differentiate into mature adipocytes when needed<sup>32</sup>, a committed preadipocyte cluster  
398 (*Col4a1*, *Col4a2*, *Col15a1*, *Fabp4*, *Plin2*), which represent a transitional state between stem-  
399 like preadipocytes and mature adipocytes, and an adipogenesis regulatory cell cluster (*Fmo2*,  
400 *F3*, *Clec11a*), which are able to suppress adipogenesis *in vivo*<sup>33</sup>. Lastly. We also found a  
401 cluster of mature adipocytes (*Cd36*, *Fabp4*, *Pparg*) (**Figure 7B and 7C**). Importantly, the  
402 mature adipocyte populations were exclusively detected in the naïve samples and not in

403 infected controls, perhaps due to the wasting associated with infection. During infection, we  
404 noted an increase in the frequency of the interstitial preadipocyte 1 cluster compared to naïve  
405 controls (**Figure 7D**), resulting in a decrease in the frequency of other subsets, including  
406 mature adipocytes, which might reflect the histological findings associated with iWAT wasting.  
407 Of the preadipocyte populations that we identified, we noted that *Il17ra* expression was  
408 robustly expressed in both interstitial preadipocyte clusters, and to a lesser extent in the  
409 committed preadipocyte cluster, (**Figure 7E**), but not in adipogenesis-regulatory cells or  
410 mature adipocytes, suggesting that both interstitial and committed preadipocytes are able to  
411 sense IL-17A/F signalling in response to infection. Using *in silico* gene module scoring to  
412 assess expression of genes involved in lipolysis (e.g. *Pnpla2*, *Plaat3*, *Mgll*, *Fabp4*), we  
413 identified that responses to chronic *T. brucei* infection were observed in committed  
414 preadipocytes and adipogenesis-regulatory cells (**Figure 7F**). This possible elevation of  
415 lipolysis is in contrast to our data from later timepoints of infection, where we found evidence  
416 of decreased lipolysis (**Figure 2H, 2I, 3G, and 3H**). Glycerol, which is released through  
417 lipolysis can also enter the glycolysis pathway, where it can contribute to either energy  
418 generation through entry into the tricarboxylic acid (TCA) cycle, or it can enter the pentose  
419 phosphate pathway (PPP) and can support inflammation<sup>34</sup>. We therefore looked at the  
420 expression of genes associated with glycolysis and the TCA cycle (**Supplementary Figure**  
421 **S4A**). We found that genes associated with glycolysis and the downstream generation of  
422 lactate (*Hk2*, *Ldha*) were upregulated during infection, across all preadipocyte populations.  
423 We also found upregulation of key TCA cycle genes, including those encoding for succinate  
424 dehydrogenase (*Sdhb*) and malate dehydrogenase (*Mdh1*, *Mdh2*) during infection, which  
425 could contribute to reactive oxygen species (ROS) generation. Finally, we explored genes in  
426 the pentose phosphate pathway (**Supplementary Figure S4B**) and found upregulation of key  
427 genes within this pathway (including *Aldoa*, *Gpi1*). Taken together, these results demonstrate  
428 that during early infection time points, interstitial and committed preadipocytes upregulate  
429 gene pathways associated with IL-17 signalling and lipolysis.

### 430 **IL-17A/F signalling on adipocyte is critical for controlling tissue wasting and local** 431 **parasite burden in the iWAT**

432 Our scRNAseq dataset clearly demonstrates that both interstitial and committed  
433 preadipocytes upregulate *Il17ra* expression in response to *T. brucei* infection, rendering them  
434 able to sense IL-17A/F locally. Since committed preadipocytes are on a fixed trajectory to a  
435 mature adipocyte lineage<sup>35</sup>, we asked whether IL-17A/F signalling through adipocytes plays a  
436 role in driving changes in bodyweight, iWAT mass and/or iWAT lipid content. To address this,  
437 we generated mice with a constitutive deficiency of *Il17ra* in white adipocytes, across all white  
438 adipose tissue depots (*Adipoq<sup>Cre</sup> x Il17ra<sup>fl/fl</sup>*) and infected them alongside C57BL/6 controls,  
439 housing them in single-housing. We observed that adipocytes from *Adipoq<sup>Cre</sup> x Il17ra<sup>fl/fl</sup>* mice

440 maintained their bodyweight (and at points increased their weight) throughout the course of  
441 infection compared to wildtype controls, which lose bodyweight, in particular after 20dpi  
442 (**Figure 8A**). These results mirrored the results obtained from the *Il17a<sup>f/-</sup>*, which were also  
443 protected from the infection-induced weight loss (**Figure 7D and Supplementary Figure**  
444 **S5A**). Additionally, we observed that both *Il17a<sup>f/-</sup>* and *Adipoq<sup>Cre</sup> x Il17ra<sup>fl/fl</sup>* mice had a higher  
445 food intake over the course of infection compared to wildtype controls (**Figure 8B** and  
446 **Supplementary Figure S5B**), suggesting that IL-17A signalling regulates both bodyweight  
447 and food intake. Next, we assessed whether adipocyte IL-17A signalling influenced iWAT  
448 mass during *T. brucei* infection. As with mice globally deficient for IL-17A/F (**Figure 5F**),  
449 infected *Adipoq<sup>Cre</sup> x Il17ra<sup>fl/fl</sup>* mice also experienced less iWAT wasting compared with  
450 C57BL/6 mice (**Figure 8C**). We also found that in contrast to naïve C57BL/6 mice, *Adipoq<sup>Cre</sup>*  
451 *x Il17ra<sup>fl/fl</sup>* mice had a higher frequency of small adipocytes, particularly in the 100-300  $\mu\text{m}^2$   
452 range (**Figure 8D and 8E**). Infected *Adipoq<sup>Cre</sup> x Il17ra<sup>fl/fl</sup>* mice also had higher frequencies of  
453 small adipocytes in the 51-200  $\mu\text{m}^2$  range, compared with C57BL/6 mice (**Figure 8F**). The  
454 significantly higher frequency of smaller adipocytes in the *Adipoq<sup>Cre</sup> x Il17ra<sup>fl/fl</sup>* mice arise from  
455 an accumulation of interstitial preadipocytes, as shown in our single cell dataset (**Figure 7**),  
456 which are unable to differentiate to mature adipocytes. Together, this suggests that while the  
457 infected *Adipoq<sup>Cre</sup> x Il17ra<sup>fl/fl</sup>* mice retain more iWAT mass, the composition of the tissue is  
458 changed compared with C57BL/6 mice. To test this, we measured the expression of *Pi16* and  
459 *Dpp4*, which were exclusively upregulated in preadipocytes in our single cell dataset  
460 (**Supplementary Figure S5C**), as well as *Pparg* as a marker of mature adipocytes. Although  
461 we observed no significant increase in *Dpp4* or *Pi16* expression in the iWAT of infected  
462 C57BL/6 mice, both genes were significantly upregulated in the iWAT of infected *Adipoq<sup>Cre</sup> x*  
463 *Il17ra<sup>fl/fl</sup>* mice (**Figure 8G**). In addition, *Pparg* was upregulated in the iWAT of infected C57BL/6  
464 mice, but unchanged in infected *Adipoq<sup>Cre</sup> x Il17ra<sup>fl/fl</sup>* mice (**Figure 8G**). Together, these data  
465 indicate that in the absence of functional IL-17 signalling on adipocytes, the *Pi16<sup>+</sup> Dpp4<sup>+</sup>*  
466 interstitial preadipocytes are unable to complete their differentiation and/or development  
467 programme successfully towards *Pparg<sup>+</sup>* mature adipocytes (**Figure 8G**). Unexpectedly, we  
468 also found significantly higher number of parasites in the iWAT of *Adipoq<sup>Cre</sup> x Il17ra<sup>fl/fl</sup>*  
469 compared with C57BL/6 mice (**Figure 8H and 8I**), indicating that signalling through the  
470 adipocyte IL-17A receptor plays a central role in controlling local parasite numbers. These  
471 data demonstrate that IL-17 signalling is critical for promoting and/or supporting preadipocyte  
472 development towards mature adipocytes in the context of *T. brucei* infection, as well as  
473 impacting local parasite tissue burden.

474  
475  
476

## 477 Discussion

478 It is now clear that African trypanosomes establish dynamic interactions with several tissues,  
479 leading to the establishment of infectious foci important for disease transmission and  
480 pathogenesis. In this context, the adipose tissue has emerged as a critical site for survival,  
481 replication, and antigenic diversity, as recently shown<sup>36</sup>. In this study, we set out to determine  
482 the impact that African trypanosomes on the subcutaneous adipose tissue, which is adjacent  
483 to the skin and might be critical for forward transmission. Through various complementary  
484 analyses, we uncovered a previously unappreciated role of IL-17A/F in controlling tissue  
485 dynamics in response to *T. brucei* infection, acting on interstitial and/or committed  
486 preadipocytes to support adipocyte maturation and tissue replenishment under chronic  
487 inflammatory challenges. Notably, we also observed elevation of circulating IL-17A in HAT  
488 patients, suggesting that this cytokine plays a role in the human immune response to *T. brucei*  
489 infection. It is, therefore, tempting to speculate that IL-17A could also play a role in mediating  
490 the weight loss experienced by patients infected with *T. brucei*.

491 Previous studies have focused primarily on the use of a single sex during *T. brucei* infection,  
492 with a limited number of studies comparing sexes when measuring effects on reproductive  
493 organs<sup>37,38</sup>. It is understood that males and females display multiple differential responses to  
494 infection, including differences in sickness behaviour<sup>39</sup>, weight loss<sup>40</sup>, and the immune  
495 response<sup>41</sup>. This aligns with the results presented here, where we observe differences in  
496 behaviour, weight loss and the immune response between male and female mice during  
497 infection. More specifically, weight loss in male mice was coupled with decreased iWAT mass,  
498 and was associated with a decrease in adipocyte lipid droplet size in male compared to female  
499 mice, potentially indicating that male mice utilise their lipid stores at a faster rate than females.  
500 Alternatively, this may be a result of females preferentially storing lipids in iWAT compared  
501 with males<sup>42</sup>, and so throughout infection they are able to store more fatty acids obtained from  
502 their diet than males, slowing down lipid droplet shrinkage. Due to this loss of lipid content, we  
503 hypothesised that circulating glycerol, which is a proxy for measuring adipocyte lipolysis<sup>43</sup>,  
504 would be elevated during infection. We found evidence suggesting that, during early infection,  
505 metabolic pathways such as glycolysis and lipolysis become more active, likely contributing to  
506 the changes in bodyweight and iWAT mass that we observed. However, we found that in both  
507 HAT patients and chronically infected mice circulating glycerol levels are diminished during  
508 trypanosomiasis, which may occur due to the extensive loss of adipocytes and subsequent  
509 decreases in lipolysis. Thus, it is tempting to speculate that since lipolysis is a critical regulator  
510 of multiple immune compartments, including macrophages<sup>44</sup> and CD4<sup>+</sup> T cells, that  
511 downregulation of this pathway will also impair the immune response to infection. Further work  
512 is required to elucidate if this also takes places in African trypanosomiasis.

513

514 To further understand the processes driving the adipocyte shrinkage that we observed during  
515 infection, we performed bulk transcriptomic analyses on the iWAT. This supported our findings  
516 that adipose tissue lipolysis is diminished during chronic infection, showing extensive  
517 downregulation of genes associated with mitochondrial metabolism and lipolysis in both males  
518 and female mice. This suppression of metabolic pathways has been observed in response to  
519 infection with other pathogens, such as *Mycobacterium tuberculosis*<sup>46</sup>. During *M. tuberculosis*  
520 infection of the lungs, transcripts encoding enzymes of oxidative phosphorylation and the  
521 tricarboxylic acid cycle are downregulated, and there is a shift to glycolysis<sup>46</sup>, which may  
522 support the inflammatory response to infection<sup>47</sup>. Furthermore, in diseases such as anorexia  
523 nervosa, prolonged weight loss and negative energy balance, lipolysis decreases, which is  
524 hypothesised to preserve energy that is needed to maintain processes essential to survival<sup>48</sup>.  
525 In the context of *T. brucei* infection, prolonged weight loss may result in the adipose tissue  
526 shutting down its main metabolic functions during chronic infection (namely lipolysis and  
527 mitochondrial metabolism) to preserve energy stores. Alternatively, it is also possible that the  
528 observed downregulation of metabolic transcripts in iWAT in response to infection could be  
529 caused by the loss of fully differentiated adipocytes, and therefore, underrepresentation of  
530 transcripts from these cells.

531 Previous studies of the adipose tissue immune response to *T. brucei* infection focused  
532 exclusively on the gWAT of male mice, and identified an expansion of macrophage, Teff cell,  
533 and B cell populations<sup>37</sup>. In agreement with this study, we also observed an expansion of  
534 macrophages and Teff cells. However, we also noted that there was a reduction in the  
535 proportion of B cells in the iWAT of male mice, and no changes in females, which could  
536 suggest that this is a tissue- and sex-specific response. We also observed an expansion of IL-  
537 17 producing T cells by CyTOF, which validated our transcriptomics dataset. This observation  
538 led us to question whether IL-17 plays a role in controlling iWAT tissue structure and/or  
539 function during *T. brucei* infection. Deficiency of IL-17A/F prevented weight loss in *T. brucei*-  
540 infected male mice compared to immunocompetent wild type male mice, but had no effect of  
541 bodyweight on female mice. When examining the tissue responses to infection at the single  
542 cell level, we identified that both *Dpp4*<sup>+</sup> *Pi16*<sup>+</sup> interstitial and *Plin2*<sup>+</sup> committed preadipocytes  
543 significantly upregulate *Il17ra* in response to *T. brucei* infection, indicating that the capacity of  
544 these cells to sense IL-17 signalling is augmented during infection. These adipogenic  
545 precursor cells are critical for maintaining a normal supply of fully mature adipocytes under  
546 homeostatic conditions<sup>32</sup>, but their dynamics during infection remain poorly understood. Using  
547 a conditional deletion system to specifically delete *Il17ra* on adipocytes, we were able to  
548 identify a significant increase in the expression levels of *Dpp4* and *Pi16*, consistent with an  
549 accumulation of immature adipocytes. In addition to this, we found that adipocyte *Il17ra*  
550 deletion prevented upregulation of *Pparg*, further suggesting that these mice are less able to

551 develop mature adipocytes during infection. Furthermore, at the histological level, this targeted  
552 deletion resulted in a higher proportion of small adipocytes in the Il17ra-deficient mice  
553 compared to the wildtype controls, under both naïve and infection conditions. This is in  
554 agreement with previous studies showing that deficiency of the adipocyte IL-17A receptor  
555 leads to reductions in iWAT lipid content under steady-state conditions<sup>49</sup>. In these previous  
556 studies, the reductions in lipid content resulted from the induction of thermogenesis in the  
557 iWAT, when adipocyte IL-17A signalling was inhibited, leading to increased energy substrate  
558 utilisation. Whilst there is evidence to suggest that non-shivering thermogenesis can be  
559 activated during infections such as influenza<sup>50</sup>, we did not find evidence of thermogenic  
560 activation during *T. brucei* infection, which may indicate that IL-17A signalling can also drive  
561 loss of iWAT mass by potentially impairing adipocyte maturation, which has been shown to  
562 occur *in vitro*<sup>9</sup>.

563 Unexpectedly, we found that unlike global deficiency of IL-17A/F, deficiency of the adipocyte  
564 IL-17A receptor diminished control of iWAT parasite burden, which raises the possibility that  
565 adipocytes are a key contributor to the immune response to *T. brucei* infection. This  
566 discrepancy may arise since the IL-17A receptor heterodimerises to the IL-17C receptor and,  
567 therefore, transduces signals from IL-17A, IL-17F, and IL-17C<sup>51</sup>, raising the possibility that IL-  
568 17C is critical for the control of local parasite numbers. Regardless, it remains to be  
569 determined whether loss of control of parasite numbers occurs because IL-17A receptor  
570 signalling is driving changes in lipolysis, or because IL-17A receptor signalling is altering the  
571 phenotype of adipocytes in a way that is influencing the local immune response. Supporting  
572 the former possibility, we recently used scRNAseq-based cell-cell communication analyses to  
573 show that adipocytes upregulate a range of factors, including *Cd40*, *Icam1*, *Jag1*, *Tnf*, and  
574 *Tnfsf18* in response to *T. brucei* infection, which could contribute to T cell activation<sup>49</sup>.  
575 Furthermore, in the same study we found that preadipocytes upregulate expression of  
576 inflammatory cytokines and antigen presentation molecules<sup>17</sup>. The inability to control local  
577 parasite numbers when adipocyte IL-17A receptor signalling is abrogated suggests that  
578 adipocytes are critical contributors to and coordinators of the local immune response to *T.*  
579 *brucei* infection, either by direct engagement with the immune system (e.g., *via* T cell  
580 activation), through metabolic fuelling (e.g., lipid mobilisation and release), or both. Recent  
581 work also found that when adipocytes can no longer engage lipolysis, there is a transient  
582 increase in the number of parasites in the gonadal adipose tissue early during infection<sup>52</sup>. The  
583 transient nature of this change could suggest that lipolysis is fuelling a specific arm of the  
584 immune response to infection that is necessary for parasite control at that time point. Although  
585 there is the possibility that lipolysis can limit parasite numbers due to lipotoxicity<sup>52</sup>, the  
586 parasites also upregulate genes associated with fatty acid oxidation when they reside in the  
587 adipose tissue<sup>6</sup>, potentially indicating that they are capable of adapting to the lipid-rich



588 environment and may be resistant to lipotoxicity. The findings that we present here show that  
589 when local IL-17A receptor signalling is abrogated the architecture of the iWAT changes to  
590 contain more immature preadipocytes compared to wildtype controls, impacting the efficiency  
591 of the local immune response, and resulting in a higher parasite burden, once more placing  
592 adipocyte dynamics at the core of the immunological responses against *T. brucei* in the  
593 adipose tissue.

594 Based on all these observations, we propose a model whereby chronic *T. brucei* infection  
595 leads to an increase in circulating IL-17A/F in humans and animals, which act locally in the  
596 adipose tissue, by direct signalling through the adipocyte IL-17 receptor, and that this, in turn,  
597 acts to coordinate adipocyte maturation, local immune response, and efficient and timely  
598 parasite control. This study provides insights into the metabolic response of the subcutaneous  
599 adipose tissue during infection with *T. brucei* and how changes in cellular metabolism  
600 influence systemic metabolism. Future work employing lineage tracing studies are necessary  
601 to understand how adipose tissue dynamics are coupled to immunological responses in the  
602 context of chronic infections.

603

604

605

606

607

608

609

610

611

612

613

614

615

616

617

618

619

620

621

622

623

624

## 625 **Figure Legends**

626 **Figure 1. Male mice lose weight during infection with *Trypanosoma brucei*, which is**  
627 **associated with alterations in feeding behaviour. (A)** Number of parasites per mL of blood,  
628 measured using phase microscopy and the rapid “matching” method<sup>53</sup>. **(B)** Clinical scores of  
629 infected male and female mice. **(C)** Percentage changes in body weight of male and **(D)**  
630 female mice over the course of infection. Percentage changes in food intake in male **(E)** and  
631 female **(F)** mice. Each data point represents 2 cages ( $n=3-4$  mice per cage). Time series data  
632 were analysed using two-way repeated measures ANOVA with Sidak post-hoc testing and are  
633 expressed as mean  $\pm$ SD. \* $p<0.05$ , \*\* $p<0.01$ , \*\*\* $p<0.001$ , ns = non-significant.

634 **Figure 2. *Trypanosoma brucei* infection leads to reductions in iWAT mass and lipid**  
635 **content, as well as impairment of adipose tissue function. (A)** Schematic highlighting the  
636 anatomical location of the inguinal white adipose tissue (iWAT) and gonadal white adipose  
637 tissue (gWAT). **(B)** Histological analysis of the iWAT and gWAT trypanosome colonisation,  
638 using HSP70 staining. **(C)** Parasite burden of iWAT and gWAT. Parasite density in the iWAT,  
639 which was measured by RT-qPCR of genomic DNA. A comparison was made with gonadal  
640 white adipose tissue (gWAT), to understand if the iWAT is also highly colonised. **(D)** iWAT  
641 mass at 25 days post-infection or in naïve mice. iWAT was dissected and weighed before  
642 normalising to body weight, to account for variation between biological replicates. Symbols  
643 indicate the number of biological replicates collected from two independent experiments **(E)**  
644 Representative histological H&E staining of iWAT showing adipocyte lipid droplets and  
645 immune infiltrate. Insets highlight likely immune cell infiltrate. **(F)** Analysis of lipid droplet area  
646 ( $\mu\text{m}^2$ ) in naïve and infected males and **(G)** females.  $N=6$  biological replicates per group, from  
647 two independent experiments. Lipid droplets were measured from 3 distinct areas in each  
648 image and then combined for each biological replicate. **(H)** Circulating glycerol concentration  
649 in naïve vs. infected male and female mice.  $n=4$  biological replicates per group. **(I)** Circulating  
650 glycerol concentration in healthy vs. infected patients.  $N=5$  patients per group and each group  
651 is a mix of male and female. For **C**, **D**, **H** and **I**, data were analysed using a two-tailed Student  
652 t test. For **F** and **G**, data were analysed using a two-way ANOVA with Sidak post-hoc testing.  
653 Data for all panels are expressed as mean  $\pm$ SD. \* $p<0.05$ , \*\* $p<0.01$ , \*\*\* $p<0.001$ , \*\*\*\* $p<0.0001$ ,  
654 ns = non-significant.

655 **Figure 3. Transcriptomic analyses indicate a stronger  $T_H17$  response in the iWAT of**  
656 **males than females. (A)** Principal component analysis of bulk transcriptomic data from male  
657 and female naïve and infected mice. **(B)** Heatmaps, clustered by Euclidean distance, of  
658 differentially expressed genes in the iWAT of naïve vs infected male and female mice. **(C and**  
659 **D)** Pathway enrichment analysis of upregulated and downregulated genes in male mice. **(E**  
660 **and F)** Pathway enrichment analysis of upregulated and downregulated genes in female mice.  
661 **(G)** Heatmap of  $T_H17$  transcripts in male mice.  $n=4$  biological replicates per group.

662 **Figure 4. Elevated circulating IL-17A is associated with increased IL-17 receptor A (IL-**  
663 **17RA) in male mice during *T. brucei* infection. (A)** t-distributed stochastic neighbour  
664 embedding (t-SNE) plots of broad macrophage and T cell populations. We gated on CD45<sup>+</sup>,  
665 CD3ε<sup>+</sup>, TCRβ<sup>+</sup>, CD4<sup>+</sup> cells. **(B)** Measurements of the proportions of macrophages, **(C)**  
666 granulocytes, **(D)** dendritic cells **(E)** and B cells. **(F)** Measurements of the proportions of CD4<sup>+</sup>,  
667 **(G)** T effector (Teff), **(H)** IFNγ-producing and **(I)** IL-17A-producing T cells. Measurements of  
668 circulating serum IL-17A, TNFα, and IFNγ in mice **(J)** and IFNγ, TNFα and total IL-17 in  
669 humans **(K)**. **(L)** Expression of interleukin-17A receptor (*Il17ra*) mRNA in infected male and  
670 female mice. Mouse cytokine data were collected from samples taken across three  
671 independent experiments. Data were tested for normal distribution and analysed by either  
672 one-way ANOVA or a Kruskal Wallis test. Biological replicates are indicated by symbols for  
673 each panel. Data for all panels are expressed as mean ±SD. \**p*<0.05, \*\**p*<0.01, \*\*\**p*<0.001,  
674 \*\*\*\**p*<0.0001, ns = non-significant.

675 **Figure 5. IL-17A/F limits clinical symptoms during *T. brucei* infection and drives weight**  
676 **adipose tissue wasting in male mice. (A)** Number of parasites per mL of blood in *Il17af<sup>-/-</sup>* vs  
677 wild type male mice, which was measured using phase microscopy and the rapid “matching”  
678 method<sup>53</sup>. **(B)** Comparison of clinical scores between C57BL/6 and *Il17af<sup>-/-</sup>* mice. **(C)** Parasite  
679 burden of inguinal WAT (iWAT) and gonadal WAT (gWAT). **(D)** Percentage changes in  
680 bodyweight of wild type and *Il17af<sup>-/-</sup>* male mice over the course of infection. *n*=7 mice per group  
681 across two independent experiments. **(E)** Changes in gross food intake over the course of  
682 infection. Each data point represents 2 cages (*n*=3-4 mice per condition) from 2 independent  
683 experiments. **(F)** iWAT mass in infected C57BL/6 and *Il17af<sup>-/-</sup>* male mice. **(G)** H&E staining of  
684 iWAT from male *Il17af<sup>-/-</sup>* mice. **(H and I)** Analysis of lipid droplet area (μm<sup>2</sup>) in naïve and  
685 infected male mice. Lipid droplets were measured from 3 distinct areas in each image and  
686 then combined for each biological replicate. Data for C57BL/6 mice in panels **A, B, D** are taken  
687 from Figure 1. Data for C57BL/6 mice in panels **H** are taken from Figure 2. Data were analysed  
688 using two-way repeated measures ANOVA with Sidak post-hoc testing or a one-way ANOVA  
689 with Tukey post-hoc testing. Data points represent biological replicates. With the exception of  
690 panels **C** and **G**, data are from 2-3 independent experiments. Data are expressed as ±SD.  
691 \*\**p*<0.01, \*\*\*\**p*<0.0001.

692 **Figure 6. *T. brucei* infection leads to expansion of IL-17A<sup>+</sup> cells in the iWAT during early**  
693 **infection. (A)** Uniform manifold approximation and projection (UMAP) of 46,546 high-quality  
694 cells from single cell RNA sequencing (scRNAseq) dataset. **(B)** Frequency plot showing  
695 changes in cell frequency under naïve or infectious conditions. **(C)** Dot plot representing the  
696 expression levels of top marker genes used to catalogue the diversity of cells within the  
697 dataset. The side of the dots represent the percentage of cells that express a given marker,

698 and the colour intensity represent the level of expression. (D) UMAP of subset T cell clusters.  
699 (E) Dot plot representing the expression levels of top marker genes used to categorise T cell  
700 populations. (F) Flow cytometry analysis of the proportion of all live IL-17A<sup>+</sup> cells. Frequency  
701 of (G) T<sub>H</sub>17, and (H) TCR $\gamma\delta$ <sup>+</sup> T cells in the iWAT. Frequency of (I) CD27<sup>-</sup> and (J) CD27<sup>+</sup>  $\gamma\delta$  T  
702 cells in the iWAT. Single cell data are comprised of one technical replicate per condition, each  
703 containing pooled cells from the iWAT of 5 male mice replicate. For flow cytometry data, data,  
704 biological replicates are indicated by symbols for each panel, and data were analysed using a  
705 student's t-test. Data are expressed as  $\pm$ SD. \* $p$ <0.05, \*\*\*\* $p$ <0.0001, ns=non-significant.

706 **Figure 7. *T. brucei* infection leads to upregulation of the IL-17A receptor and genes**  
707 **associated with lipolysis in preadipocytes.** (A) Violin plot showing the expression level of  
708 the IL-17A receptor (*Il17ra*) across all cell populations in our scRNAseq dataset. (B) UMAP of  
709 subclustered preadipocytes. (C) Dot plot showing expression of genes used to identify specific  
710 populations of preadipocytes. (D) Frequency plot of preadipocyte populations. (E) Violin plot  
711 showing expression of *Il17ra* in specific preadipocyte populations. (F) Lipolysis gene module  
712 score of genes typically associated with lipolysis across all preadipocyte subsets detected in  
713 (B). Single cell data are comprised of one technical replicate per condition, each containing  
714 pooled cells from the iWAT of 5 male mice replicate.

715 **Figure 8. Adipocyte IL-17A signalling is critical for control of parasite numbers in the**  
716 **iWAT.** (A) Percentage changes in body weight of male C57BL/6 or *Adipoq*<sup>Cre</sup> x *Il17ra*<sup>Flox</sup> mice.  
717 (B) Percentage changes in food intake of singly housed male C57BL/6 or *Adipoq*<sup>Cre</sup> x *Il17ra*<sup>Flox</sup>  
718 mice. (C) iWAT mass at 25 days post-infection or in naïve mice. iWAT was dissected and  
719 weighed before normalising to body weight, to account for variation between biological  
720 replicates. Symbols indicate the number of biological replicates collected from two  
721 independent experiments. (D) Representative histological H&E staining of iWAT showing  
722 adipocyte lipid droplets and immune infiltrate. Analysis of lipid droplet area ( $\mu\text{m}^2$ ) in naïve (E)  
723 and infected (F) males.  $n=3-4$  biological replicates per group. Lipid droplets were measured  
724 from 3 distinct areas in each image and then combined for each biological replicate. (G) RT-  
725 qPCR of *Pi16*, *Dpp4*, and *Pparg* from the iWAT. Cartoon illustrates gene expression by  
726 interstitial preadipocytes (IPAs) or mature adipocytes. (H) Histological analysis of the iWAT  
727 trypanosome colonisation. (I) Parasite density in the iWAT, which was measured by RT-qPCR  
728 of genomic DNA. For A, B, E and F, data were analysed using a two-way ANOVA with Sidak  
729 post-hoc testing. For C, data were analysed using a student's t-test. For G, data were analysed  
730 using a one-way ANOVA with Tukey's post-hoc testing. Biological replicates are indicated by  
731 symbols for histograms. For other plots,  $n=4$  biological replicates/group. Data for all panels  
732 are expressed as mean  $\pm$ SD. \* $p$ <0.05, \*\* $p$ <0.01, \*\*\* $p$ <0.001, \*\*\*\* $p$ <0.0001, ns = non-  
733 significant.

734

735 **Supplementary Figure Legends**

736 **Supplementary Figure S1.** Spleen weights were normalised to bodyweight and the fold  
737 change in weight calculated. Each point represents a biological replicate. Data were analysed  
738 using one-way ANOVA with Tukey post-hoc testing. Data are expressed as mean  $\pm$ SD.  
739 \*\*\*\* $p < 0.0001$ .

740 **Supplementary Figure S2.** Heatmaps, clustered by Euclidean distance, showing  
741 downregulation of lipolysis-related genes in male (A) and female (B) mice during chronic *T.*  
742 *brucei* infection

743 **Supplementary Figure S3.** (A) Number of parasites per mL of blood, measured using phase  
744 microscopy and the rapid “matching” method<sup>53</sup>. (B) Clinical scores of infected female mice.  
745 (C) Histological analysis of the iWAT and gWAT trypanosome colonisation, using HSP70  
746 staining. (D) Parasite burden of iWAT and gWAT, which was measured by RT-qPCR of  
747 genomic DNA. (E) Percentage changes in body weight of female mice over the course of  
748 infection. (F) Percentage change in gross food intake. Each data point represents 2 cages  
749 ( $n=3-4$  mice per cage). Spleen weights from males (G) and females (H) were normalised to  
750 bodyweight and the fold change in weight calculated. (I) iWAT mass at 25 days post-infection  
751 or in naïve mice. iWAT was dissected and weighed before normalising to body weight, to  
752 account for variation between biological replicates. (J) Representative histological H&E  
753 staining of iWAT showing adipocyte lipid droplets and immune infiltrate. (K) Analysis of lipid  
754 droplet area ( $\mu\text{m}^2$ ) in naïve and infected females.  $N=6$  biological replicates per group, from  
755 two independent experiments. Lipid droplets were measured from 3 distinct areas in each  
756 image and then combined for each biological replicate. Time series data were analysed using  
757 two-way repeated measures ANOVA with Sidak post-hoc testing. D, G, and H were analysed  
758 using a one-way ANOVA with Tukey’s post-hoc testing. I was analysed using a student’s t-  
759 test. Data for all panels are expressed as mean  $\pm$ SD. \* $p < 0.05$ , \*\*\*\* $p < 0.0001$ , ns = non-  
760 significant.

761 **Supplementary Figure S4.** Dot plot showing expression of genes involved in glycolysis and  
762 the TCA cycle (A) or the pentose phosphate pathway (B). In the key, dots represent the  
763 percentage of cells that express a given marker, and the colour intensity represent the level  
764 of expression. Single cell data are comprised of one technical replicate per condition, each  
765 containing pooled cells from the iWAT of 5 male mice replicate.

766 **Supplementary Figure S5.** (A) Three-way comparison of the bodyweight of single-housed  
767 infected C57BL/6, *Il17af*<sup>-/-</sup> and *Adipoq*<sup>Cre</sup> x *Il17ra*<sup>Flox</sup> mice. (B) Three-way comparison of the  
768 food intake of single-housed infected C57BL/6, *Il17af*<sup>-/-</sup> and *Adipoq*<sup>Cre</sup> x *Il17ra*<sup>Flox</sup> mice. (C) )  
769 Dot plot from scRNAseq showing expression of *Dpp4* and *Pi16* across all cell populations.  
770 Time series data were analysed using two-way repeated measures ANOVA with Sidak post-  
771 hoc testing. Data for all panels are expressed as mean  $\pm$ SD.

## 772 **Materials & Methods**

### 773 **Ethics statement**

774 Male and female human serum samples used for IL-17A measurements were collected in  
775 Guinea as part of the National Control Program. Participants were informed of the study  
776 objectives in their own language and signed a written consent form. Participants comprised  
777 six males and four females, all over the age of 18 years. Approval for this study was obtained  
778 from the Comité Consultative de Déontologie et d'Ethique (CCDE) of the Institut de Recherche  
779 pour le Développement (approval number 1–22/04/2013). Due to limited sample numbers, we  
780 did not stratify data by sex. Human serum samples used for glycerol measurements were  
781 collected as part of the TrypanoGEN Biobank<sup>54</sup>, with ethical approval from the Democratic  
782 Republic of Congo National Ministry of Public Health (approval number 1/2013). Samples were  
783 used from different regions due to limitations in sample availability. Ethical approval to use all  
784 human samples outlined in this study was given by the University of Glasgow (approval  
785 number 200120043). All animal experiments were approved by the University of Glasgow  
786 Ethical Review Committee and performed in accordance with the home office guidelines, UK  
787 Animals (Scientific Procedures) Act, 1986 and EU directive 2010/63/EU. All experiments were  
788 conducted under SAPO regulations and UK Home Office project licence number PC8C3B25C  
789 and PP4863348 to Dr Jean Rodgers and Professor Annette MacLeod, respectively.

### 790 **Mouse generation and infections with *Trypanosoma brucei***

791 Eight to ten-week old Adipoq-cre (JAX, stock 028020) or Il17ratm2.1Koll/J (JAX, stock  
792 031000) were purchased from The Jackson Laboratory. These mice were crossed to generate  
793 Adipoq<sup>Cre</sup> x Il17ra<sup>Flox</sup> mice, with an adipocyte specific deletion of the IL-17A receptor. Six to  
794 eight weeks old male or female C57BL/6J (JAX, stock 000664), *Il17a*<sup>f/f</sup> (JAX, stock 034140),  
795 or IL-17A GFP reporter mice (JAX, stock 018472) were also purchased. At >10 weeks old,  
796 mice were randomly allocated to control or treatment groups by animal unit technical staff.  
797 Mice were then inoculated by intra-peritoneal injection with  $\sim 2 \times 10^3$  of the *T. brucei brucei*  
798 Antat 1.1<sup>E</sup> parasite strain<sup>55</sup>. Parasitaemia was monitored by regular sampling from tail  
799 venesection and examined using phase microscopy and the rapid “matching” method<sup>53</sup>.  
800 Uninfected mice of the same strain, sex and age served as uninfected controls. All mice were  
801 fed *ad libitum* and kept on a 12 h light–dark cycle. All *in vivo* experiments were concluded at  
802 25 days post-infection, to model chronic infection in humans.

### 803 **RNA Purification and Bulk RNA sequencing**

804 iWAT was harvested and stored in TRIzol<sup>TM</sup> (Invitrogen). Total RNA was then purified using  
805 an RNeasy Kit (Qiagen) as per the manufacturer’s recommendations. The RNA was purified  
806 in 30  $\mu$ L of nuclease-free water (Qiagen), and RNA concentration measured on a NanoDrop<sup>TM</sup>  
807 2000 (Thermo Fisher Scientific). Samples were shipped to Novogene (Cambridge, UK) to

808 undergo quality control, library preparation and sequencing. RNA integrity was assessed using  
809 an RNA Nano 6000 Assay Kit (Agilent Technologies) with a Bioanalyzer 2100 (Agilent  
810 Technologies), as per the manufacturer's instructions. Samples with an RNA integrity number  
811 (RIN) of >6.0 were qualified for RNA sequencing.

812 *Library Preparation:* Library preparation was performed by Novogene (Cambridge, UK).  
813 Messenger RNA (mRNA) was purified from total RNA using poly-T oligo-attached magnetic  
814 beads. Fragmentation was carried out using divalent cations under elevated temperature in a  
815 First Strand Synthesis Reaction Buffer (5X). First strand cDNA was synthesized using random  
816 hexamer primers and M-MuLV Reverse Transcriptase (RNase H-). Second strand cDNA  
817 synthesis was then performed using DNA Polymerase I and RNase H. Remaining overhangs  
818 were converted to blunt ends *via* exonuclease/polymerase activity. Following adenylation of  
819 3' ends of DNA fragments, adaptors with hairpin loop structures were ligated. To select cDNA  
820 fragments of 370~420 bp in length, library fragments were purified using AMPure XP beads  
821 (Beckman Coulter), as per the manufacturer's instructions. PCR was then performed using  
822 Phusion High-Fidelity DNA polymerase, Universal PCR primers, and Index (X) primers.  
823 Finally, PCR products were purified (AMPure XP system) using AMPure XP beads (Beckman  
824 Coulter), as per the manufacturer's instructions, and library quality was assessed using a  
825 Bioanalyzer 2100 (Agilent Technologies).

826 *Sequencing and data analysis:* Clustering of the index-coded samples was performed on a  
827 cBot Cluster Generation System using a TruSeq PE Cluster Kit v3-cBot-HS (Illumina) according  
828 to the manufacturer's instructions. After cluster generation, libraries were sequenced on an  
829 Illumina Novaseq platform and 150 bp paired-end reads were generated. Raw reads in fastq  
830 format were processed through proprietary Perl scripts developed by Novogene (Cambridge,  
831 UK). Clean reads were obtained by removing reads containing adapters, poly-N, or low-quality  
832 reads from raw data. Concurrently, the Q20, Q30 and GC content of the clean data was  
833 calculated. Genome and genome annotation files (Genome Reference Consortium Mouse  
834 Build; GRCm39) were downloaded. An index of the reference genome was built using Hisat2  
835 v2.0.5 and paired-end clean reads were aligned to the reference genome using Hisat2 v2.0.5.  
836 The featureCounts (v. 1.5.0-p3) package was used to count read numbers mapped to each  
837 gene, before calculating the Fragments Per Kilobase of transcript sequence per Millions base  
838 pairs (FPKM) of each gene using the length of the gene and reads count mapped to this gene.  
839 Differential expression analysis was performed using the DESeq2 R package (v. 1.20.0).  
840 DESeq2 The resulting *p*-values were adjusted using the Benjamini and Hochberg approach  
841 to control false discovery rate. Genes with an adjusted *p*-value of <0.05 were assigned as  
842 differentially expressed. Pathway enrichment analysis of differentially expressed genes was  
843 performed using the ShinyGO (v. 0.76) package, mapping genes to the Kyoto Encyclopaedia  
844 of of Genes and Genomes (KEGG) database. KEGG terms with an adjusted *p*-value <0.05

845 were considered significantly enriched. Heatmaps were generated using the pheatmap  
846 (Version 1.0.12) and Tidyverse packages in R (Version 4.2.1). Samples were clustered by  
847 Euclidean distance.

### 848 **Adipose tissue processing and preparation of single cell suspension for single-cell** 849 **RNA sequencing**

850 Infected animals and naïve controls were anesthetized with isoflurane at 7 days post-infection  
851 and perfused transcardially with 25-30 ml of ice-cold 1X PBS containing 0.025% (wt/vol)  
852 EDTA, and both iWAT pads were excised, and the inguinal lymph node removed. For each  
853 condition, fat pads were pooled from 5 mice, resulting in a single technical replicate per  
854 condition. The iWAT was dissociated using an Adipose Tissue Dissociation Kit, mouse and  
855 rat (Miltenyi Biotec) with a gentleMACS™ Octo Dissociator with Heaters (Miltenyi Biotec) as  
856 per the manufacturer's recommendations. Digested tissue was then passed through a 70 µm  
857 and then a 40 µm nylon mesh filter, which were washed with DMEM. The suspension was  
858 then centrifuged at 400 x g at 4°C for 5 minutes to isolate the stromal vascular fraction and  
859 remove adipocytes. Finally, cells were passed through a MACS dead cell removal kit (Miltenyi  
860 Biotec) and diluted to ~1,000 cells/µl in 200µl HBSS 0.04% BSA and kept on ice until single-  
861 cell capture using the 10X Chromium platform. The single cell suspensions were loaded onto  
862 independent single channels of a Chromium Controller (10X Genomics) single-cell platform.  
863 Single cells were loaded for capture using 10X Chromium NextGEM Single cell 3 Reagent kit  
864 v3.1 (10X Genomics). Following capture and lysis, complementary DNA was synthesized and  
865 amplified (12 cycles) as per the manufacturer's protocol (10X Genomics). The final library  
866 preparation was carried out as recommended by the manufacturer with a total of 14 cycles of  
867 amplification. The amplified cDNA was used as input to construct an Illumina sequencing  
868 library and sequenced on a Novaseq 6000 sequencers by Glasgow Polyomics.

### 869 **Read mapping, data processing, and integration**

870 For FASTQ generation and alignments, Illumina basecall files (\*.bcl) were converted to  
871 FASTQs using bcl2fastq. Gene counts were generated using Cellranger v.6.0.0 pipeline  
872 against a combined *Mus musculus* (mm10) and *Trypanosoma brucei* (TREU927)  
873 transcriptome reference. After alignment, reads were grouped based on barcode sequences  
874 and demultiplexed using the Unique Molecular Identifiers (UMIs). The mouse-specific digital  
875 expression matrices (DEMs) from all six samples were processed using the R (v4.2.1)  
876 package Seurat v4.1.017. Additional packages used for scRNAseq analysis included dplyr  
877 v1.0.7 18, RColorBrewer v1.1.2 (<http://colorbrewer.org>), ggplot v3.3.5 19, and sctransform  
878 v0.3.3 20. We initially captured 50,640 cells mapping specifically against the *M. musculus*  
879 genome across all conditions and biological replicates, with an average of 20,209 reads/cell  
880 and a median of 1,302 genes/cell (**Supplementary Table 3**). The number of UMIs was then  
881 counted for each gene in each cell to generate the digital expression matrix (DEM). Low quality



882 cells were identified according to the following criteria and filtered out: i) nFeature > 100 or  
883 <5,000, ii) nCounts > 100 or <20,000, iii) > 30% reads mapping to mitochondrial genes, and  
884 iv) > 40% reads mapping to ribosomal genes, v) genes detected < 3 cells. After applying this  
885 cut-off, we obtained a total of 46,546 high quality mouse-specific cells with a median of 1,296  
886 genes/cell (**Supplementary Table 3**). High-quality cells were then normalised using the  
887 SCTransform function, regressing out for total UMI and genes counts, cell cycle genes, and  
888 highly variable genes identified by both Seurat and Scater packages, followed by data  
889 integration using IntegrateData and FindIntegrationAnchors. For this, the number of principal  
890 components were chosen using the elbow point in a plot ranking principal components and  
891 the percentage of variance explained.

### 892 **Cluster analysis, marker gene identification, and subclustering**

893 The integrated dataset was then analysed using RunUMAP (10 dimensions), followed by  
894 FindNeighbors (10 dimensions, reduction = "pca") and FindClusters (resolution = 0.4). With  
895 this approach, we identified a total of 16 cell clusters The cluster markers were then found  
896 using the FindAllMarkers function (logfc.threshold = 0.25, assay = "RNA"). To identify cell  
897 identity confidently, we employed a supervised approach. This required the manual inspection  
898 of the marker gene list followed by and assignment of cell identity based on the expression of  
899 putative marker genes expressed in the unidentified clusters. To increase the resolution of our  
900 clusters to help resolve potential mixed cell populations embedded within a single cluster, we  
901 subset preadipocytes and T cells and analysed them separately using the same functions  
902 described above. In all cases, upon subsetting, the resulting objects were reprocessed using  
903 the functions FindVariableFeatures, ScaleData, RunUMAP, FindNeighbors, and FindClusters  
904 with default parameters. The number of dimensions used in each case varied depending on  
905 the cell type being analysed but ranged between 5 and 10 dimensions. Cell type-level  
906 differential expression analysis between experimental conditions was conducted using the  
907 FindMarkers function (min.pct = 0.25, test.use = Wilcox) and (DefaultAssay = "SCT").

### 908 **DNA Purification**

909 Tissues were harvested from mice and snap frozen. Tissue was digested using a DNeasy  
910 Blood and Tissue kit (Qiagen), before purifying DNA as per the manufacturer's instructions.  
911 DNA was eluted in 100 µL of EB buffer (Qiagen).

### 912 **Tissue Parasite Burden Quantification**

913 To quantify *T. brucei* parasites in tissue, we amplified 18S ribosomal DNA genes from the  
914 gDNA of a known mass of tissue, using qRT-PCR Brilliant II Probe Master Mix (Agilent  
915 Technologies) with a TaqMan™ TAMRA Probe system (Applied Biosystems). Primer  
916 sequences were specific to *T. brucei* 18S ribosomal DNA (**Table 1**). The cycling conditions  
917 used for qRT-PCR are outlined in **Table 2**. Generated data was converted to parasite copy  
918 number using a standard curve.

919

| Primer/probe name           | Primer/probe sequence                                     |
|-----------------------------|-----------------------------------------------------------|
| TBPFR Forward Taqman primer | CCA ACC GTG TGT TTC CTC CT                                |
| TBPFR Reverse Taqman primer | CGG CAG TAG TTT GAC ACC TTT TC                            |
| TBPFR probe                 | 5'-FAM CTT GTC TTC TCC TTT TTT GTC TCT TTC CCC CT 3'TAMRA |

920 **Table 1.** Primer and probe sequences for tissue parasite burden quantification

921

| Step | Temperature (°C) | Time       | Number of cycles |
|------|------------------|------------|------------------|
| 1    | 95               | 10 minutes | 1                |
| 2    | 95               | 15 seconds | 45               |
| 3    | 60               | 1 minutes  |                  |
| 4    | 72               | 1 seconds  |                  |

922 **Table 2.** Thermal cycling conditions for tissue parasite burden quantification

923

#### 924 Real-time quantitative PCR

925 Following RNA purification, cDNA was synthesised, and the RT-qPCR master mix prepared  
 926 using a Luna Universal One-Step RT-qPCR Kit (New England Biolabs), as per the  
 927 manufacturer's instructions, with the primers outlined in **Table 3**. The RT-qPCR was run on a  
 928 Roche LightCycler 480 (Roche Diagnostics Ltd) using the conditions outlined in **Table 4**.

929

| Gene         | Forward Sequence          | Reverse Sequence        |
|--------------|---------------------------|-------------------------|
| <i>Dpp4</i>  | CACCTCTGATGGAAGCAGCTTC    | GATAATCGCTGGTCAGAGCTTCG |
| <i>Pi16</i>  | AACTGGCACGAGGAGCATGAGT    | GCCAATTCTCTCAGTCTTGCTCC |
| <i>Cd34</i>  | AGGACAGCAGTAAGACCACACC    | GTGTGGAGTTCCAGAGCCTGAA  |
| <i>Pparg</i> | GTA CTGTTCGGTTTCAGAAGTGCC | ATCTCCGCCAACAGCTTCTCCT  |
| <i>Actb</i>  | CATTGCTGACAGGATGCAGAAGG   | TGCTGGAAGGTGGACAGTGAGG  |

930 **Table 3.** Primer sequences for RT-qPCR

| Number of cycles | Temperature (°C) | Time    |
|------------------|------------------|---------|
| 1                | 95               | 3 min   |
| 40               | 95               | 10 secs |
|                  | 60               | 30 secs |

931 **Table 4.** Cycling conditions for RT-qPCR

#### 932 Histological Analyses

933 Tissues were placed into 4% paraformaldehyde (PFA) and fixed overnight at room  
934 temperature. PFA-fixed tissues were then embedded in paraffin, sectioned, and stained by  
935 the Veterinary Diagnostic Services facility (University of Glasgow, UK). Sections were  
936 Haematoxylin and Eosin (H&E) stained for lipid droplet measurement analysis, or 3'-  
937 diaminobenzidine (DAB) stained for heat-shock protein 70 (HSP70) to detect *T. brucei*  
938 parasites. The HSP70 antibody was a kind gift from Professor James D. Bangs. Slide imaging  
939 was performed by the Veterinary Diagnostic Services facility (University of Glasgow, UK) using  
940 an EasyScan Infinity slide scanner (Motic) at 20X magnification. To determine lipid droplet  
941 sizes in adipose tissue, images were first opened in QuPath (v. 0.3.2)<sup>56</sup>, before selecting  
942 regions and exporting to Fiji<sup>57</sup>. In Fiji, images were converted to 16-bit format, and we used  
943 the Adiposoft plugin to quantify lipid droplet area within different sections.

#### 944 **Mass cytometry sample processing**

945 Adipose tissue was dissected out and transferred to PBS, before dissociating using an  
946 Adipose Tissue Dissociation Kit for Mouse and Rat (Miltenyi Biotec), using a gentleMACS™  
947 Octo Dissociator with Heaters (Miltenyi Biotec), as per the manufacturer's recommendations.  
948 After the final recommended centrifugation, the pellet (containing the immune cells) was  
949 resuspended in Dubecco's Modified Eagle Medium (DMEM) to a concentration of  $1 \times 10^6$   
950 cells/mL. Cells were activated for 3 h in a round-bottom 96-well plate using Cell Activation  
951 Cocktail (with Brefeldin A) (BioLegend). Plates were then centrifuged at 300 x g for 5 min and  
952 the pellets resuspended in 50  $\mu$ L of Cell-ID™ Cisplatin-195Pt viability reagent (Standard  
953 BioTools), and incubated at room temperature for 2 min. Cells were washed twice in Maxpar®  
954 Cell Staining Buffer (Standard BioTools), and centrifuged at 300 x g at room temperature for  
955 5 min. The CD16/CD32 receptors were then blocked by incubating with a 1/50 dilution of  
956 TruStain FcX™ (BioLegend) in PBS at room temperature for 15 min. An antibody cocktail was  
957 prepared (**Table 5**) from the Maxpar® Mouse Sp/LN Phenotyping Panel Kit (Standard  
958 BioTools) with additional antibodies against IL-17A, IFN $\gamma$ , TCRgd, and CD27 included (**Table**  
959 **5**). Cells were incubated with antibodies (**Table 5**) for 60 min, on ice before washing 3 times  
960 in Maxpar® Cell Staining Buffer (Standard BioTools) as previously.

961 Following staining, cells were fixed in 2% paraformaldehyde (PFA) overnight at 4°C. Cells  
962 were then washed twice with 1 x eBioscience™ Permeabilization Buffer (Invitrogen) at 800 x  
963 g at room temperature for 5 min. The pellets were resuspended in intracellular antibody  
964 cocktail (**Table 5**) and incubated at room temperature for 45 min. Cells were washed 3 times  
965 in Maxpar® Cell Staining Buffer (Standard BioTools) at 800 x g. The cells were then  
966 resuspended in 4% PFA at room temperature for 15 min, before collecting the cells at 800 x g  
967 and resuspending in Cell-ID™ Intercalator-Ir (Standard BioTools). Finally, the cells were  
968 barcoded by transferring the stained cells to a fresh tube containing 2  $\mu$ L of palladium barcode

969 from the Cell-ID™ 20-Plex Pd Barcoding Kit (Standard BioTools). Cells were then frozen in a  
 970 freezing solution (90% FBS and 10% DMSO), before shipping to the Flow Cytometry Core  
 971 Facility at the University of Manchester for data acquisition.  
 972

| Surface Antibodies       |                 |                  |               |          |
|--------------------------|-----------------|------------------|---------------|----------|
| Antibody                 | Metal Conjugate | Clone            | Concentration | Cat. No. |
| Ly6G/C [Gr1]             | 141Pr           | RB6-8C5          | 1/100         | 201306   |
| CD11c                    | 142Nd           | N418             | 1/100         |          |
| CD69                     | 145Nd           | H1.2F3           | 1/100         |          |
| CD45                     | 147Sm           | 30-F11           | 1/200         |          |
| CD11b                    | 148Nd           | M1/70            | 1/100         |          |
| CD19                     | 149Sm           | 6D5              | 1/100         |          |
| CD3e                     | 152Sm           | 145-2C11         | 1/100         |          |
| TCRβ                     | 169Tm           | H57-597          | 1/100         |          |
| CD44                     | 171Yb           | IM7              | 1/100         |          |
| CD4                      | 172Yb           | RM4-5            | 1/100         |          |
| Intracellular Antibodies |                 |                  |               |          |
| IL-17A                   | 174Yb           | TC11-<br>18H10.1 | 1/100         | 3174002C |
| IFN <sub>γ</sub>         | 165Ho           | XMG1.2           | 1/100         | 3165003B |

973 **Table 5** Antibodies for mass cytometry

974 **Flow cytometric analyses**

975 Infected animals and naïve controls were anesthetized with isoflurane and perfused  
 976 transcidentally with 25-30 ml of ice-cold 1X PBS containing 0.025% (wt/vol) EDTA. iWAT pads  
 977 were excised and the inguinal lymph node was removed. The iWAT was dissociated using an  
 978 Adipose Tissue Dissociation Kit, mouse and rat (Miltenyi Biotec) with a gentleMACS™ Octo  
 979 Dissociator with Heaters (Miltenyi Biotec) as per the manufacturer's recommendations.  
 980 Digested tissue was then passed through a 70 µm and then a 40 µm nylon mesh filter, which  
 981 were washed with DMEM. The suspension was then centrifuged at 400 x g at 4°C for 5 minutes  
 982 to isolate the immune cell fraction and remove adipocytes. The resulting suspension was  
 983 seeded on a 96-well plate and stimulated with 1X Cell Activation Cocktail containing phorbol  
 984 12-myristate 13-acetate (PMA), Ionomycin, and Brefeldin A (BioLegend) for 3 h at 37 °C and  
 985 5% CO<sub>2</sub>. For flow cytometry analysis, single cell suspensions were resuspended in ice-cold  
 986 FACS buffer (2 mM EDTA, 5 U/ml DNase I, 25 mM HEPES and 2.5% foetal calf serum (FCS)  
 987 in 1X PBS) and stained for extracellular markers at 1:400 dilution (**Table 6**). Samples were

988 run on a flow cytometer LSRFortessa (BD Biosciences) and analysed using FlowJo software  
989 version 10 (Treestar).

| <b>Surface Antibodies</b>          |              |          |               |                       |
|------------------------------------|--------------|----------|---------------|-----------------------|
| Antibody/Stain                     | Conjugate    | Clone    | Concentration | Cat. No.              |
| Zombie Fixability<br>Viability Kit | Green        | N/A      | 1/1000        | 423111                |
| F4/80                              | PE/Cy7       | BM8      | 1/400         | #123115               |
| CD19                               | PE/Cy7       | 6D5      | 1/400         | #115511               |
| TCR $\gamma\delta$                 | BV421        | GL3      | 1/400         | #118119               |
| CD27                               | APC          | LG.3A10  | 1/400         | #124211               |
| CD45                               | PE or BV421  | 30-F11   | 1/400         | #103105 or<br>#103133 |
| CD3 $\epsilon$                     | PE/Dazzle594 | 145-2C11 | 1/400         | #100347               |
| CD4                                | PE           | RM4-4    | 1/400         | #116005               |

990 **Table 6** Antibodies for flow cytometry

#### 991 **Quantification of cytokine titres**

992 To measure cytokine titres in murine serum samples we used a U-PLEX Biomarker kit (Meso  
993 Scale Discovery), as per the manufacturer's instructions. Samples were analysed using a  
994 MESO QuickPlex SQ 120 (Meso Scale Discovery). IL-17A titres in human serum samples  
995 were quantified using a multiplex cytokine panel (Bio-Plex Pro Human Cytokine Assay,  
996 BioRad) and a LuminexCorp Luminex 100 machine as per the manufacturer's instructions.

#### 997 **Statistical analyses**

998 All statistical analyses were performed using Graph Prism Version 8.0 for Windows or macOS,  
999 GraphPad Software (La Jolla California USA). Normality of data distribution was measured  
1000 using the Shapiro-Wilks test. Where indicated, data were analysed by unpaired Student's t-  
1001 test, Mann-Whitney test, one-way analysis of variance (ANOVA) or two-way ANOVA. Data  
1002 were considered to be significant where  $p < 0.05$ .

#### 1003 **Data Availability**

1004 The GEO accession number for raw bulk transcriptomic sequencing and processed data  
1005 reported in this paper is GSE210600. The GEO accession number for the raw scRNAseq and  
1006 processed data reported in this paper is GSE233312. The scripts used to generate single cell  
1007 data in this study are available at Zenodo (10.5281/zenodo.7966849).

1008  
1009  
1010  
1011

## 1012 **Acknowledgements**

1013 We firstly thank the TrypanoGEN Network for providing serum samples from patients. We also  
1014 thank Jean Rodgers for the use of her project licence for performing animal work. We thank  
1015 the Histology Research Service at Veterinary Diagnostic Services, School of Veterinary  
1016 Medicine, University of Glasgow. We also thank Nicola Munro, Scott McCall and Catrina Boyd  
1017 at the Veterinary Research Facility (University of Glasgow) for maintaining optimal husbandry  
1018 conditions and comfort for the animals used in this study. We thank Julie Galbraith and Pawel  
1019 Herzyk (Glasgow Polyomics, University of Glasgow) for their support with single cell library  
1020 preparation and sequencing. Finally, the authors would like to thank the Flow Cytometry Core  
1021 Facility, University of Manchester, UK, for mass cytometry sample acquisition. This work was  
1022 funded in part by a Wellcome Trust Institutional Strategic Support Fund award [316917-01], a  
1023 Society for Endocrinology Early Career Grant [316705/0], and a Wellcome Centre for  
1024 Integrative Parasitology FutureScope grant [174811-23] to MCS. This work was also funded  
1025 in part by a Wellcome Trust Senior Research Fellowship [209511/Z/17/Z] awarded to AML.  
1026 JFQ is funded by a Sir Henry Wellcome postdoctoral fellowship (221640/Z/20/Z to JFQ). PC  
1027 is funded by Wellcome Centre for Integrative Parasitology FutureScope grant to JFQ  
1028 [104111/Z/14/Z]. GPW is funded by an MRC grant [MR/S009779/1]. CB is funded by an MRC  
1029 grant [MR/W018497/1]. SK is funded by the National Institute of Diabetes and Digestive and  
1030 Kidney Diseases and the Howard Hughes Medical Institute. The authors declare that the  
1031 research was conducted in the absence of any commercial or financial relationships that could  
1032 be construed as a potential conflict of interest.

1033

1034

1035

1036

1037

1038

1039

1040

1041

1042

1043

1044

1045

1046

1047

1048

1049 **References**

- 1050 1. Kennedy, P. G. E. Update on human African trypanosomiasis (sleeping  
1051 sickness). *J Neurol* **266**, 2334–2337 (2019).
- 1052 2. Bukachi, S. A., Wandibba, S. & Nyamongo, I. K. The socio-economic burden of  
1053 human African trypanosomiasis and the coping strategies of households in the  
1054 South Western Kenya foci. *PLoS Negl Trop Dis* **11**, e0006002 (2017).
- 1055 3. Kennedy, P. G. Clinical features, diagnosis, and treatment of human African  
1056 trypanosomiasis (sleeping sickness). *The Lancet Neurology* **12**, 186–194 (2013).
- 1057 4. Malvy, D. & Chappuis, F. Sleeping sickness. *Clinical Microbiology and Infection*  
1058 **17**, 986–995 (2011).
- 1059 5. Baazim, H., Antonio-Herrera, L. & Bergthaler, A. The interplay of immunology  
1060 and cachexia in infection and cancer. *Nat Rev Immunol* **22**, 309–321 (2022).
- 1061 6. Trindade, S. *et al.* Trypanosoma brucei Parasites Occupy and Functionally Adapt  
1062 to the Adipose Tissue in Mice. *Cell Host & Microbe* **19**, 837–848 (2016).
- 1063 7. Hube, F. & Hauner, H. The role of TNF-alpha in human adipose tissue:  
1064 prevention of weight gain at the expense of insulin resistance? *Horm Metab Res*  
1065 **31**, 626–631 (1999).
- 1066 8. Machado, H. *et al.* Trypanosoma brucei triggers a broad immune response in the  
1067 adipose tissue. *PLOS Pathogens* **17**, e1009933 (2021).
- 1068 9. Zúñiga, L. A. *et al.* IL-17 Regulates Adipogenesis, Glucose Homeostasis, and  
1069 Obesity. *The Journal of Immunology* **185**, 6947–6959 (2010).
- 1070 10. Kohlgruber, A. C. *et al.*  $\gamma\delta$  T cells producing interleukin-17A regulate adipose  
1071 regulatory T cell homeostasis and thermogenesis. *Nat Immunol* **19**, 464–474  
1072 (2018).
- 1073 11. Hu, B. *et al.*  $\gamma\delta$  T cells and adipocyte IL-17RC control fat innervation and  
1074 thermogenesis. *Nature* **578**, 610–614 (2020).

- 1075 12. van Marken Lichtenbelt, W. D. & Schrauwen, P. Implications of nonshivering  
1076 thermogenesis for energy balance regulation in humans. *Am J Physiol Regul*  
1077 *Integr Comp Physiol* **301**, R285-296 (2011).
- 1078 13. Vesely, M. C. A., Rodriguez, C., Gruppi, A. & Rodríguez, E. V. A. Interleukin-17  
1079 mediated immunity during infections with *Trypanosoma cruzi* and other  
1080 protozoans. *Biochim Biophys Acta Mol Basis Dis* **1866**, 165706 (2020).
- 1081 14. Mou, Z., Jia, P., Kuriakose, S., Khadem, F. & Uzonna, J. E. Interleukin-17-  
1082 Mediated Control of Parasitemia in Experimental *Trypanosoma congolense*  
1083 Infection in Mice. *Infect Immun* **78**, 5271–5279 (2010).
- 1084 15. da Matta Guedes, P. M. *et al.* IL-17 produced during *Trypanosoma cruzi* infection  
1085 plays a central role in regulating parasite-induced myocarditis. *PLoS Negl Trop*  
1086 *Dis* **4**, e604 (2010).
- 1087 16. Capewell, P. *et al.* The skin is a significant but overlooked anatomical reservoir  
1088 for vector-borne African trypanosomes. *eLife* **5**, e17716 (2016).
- 1089 17. Quintana, J. F. *et al.* Spatially-resolved single cell transcriptomics reveal a critical  
1090 role for  $\gamma\delta$  T cells in the control of skin inflammation and subcutaneous adipose  
1091 wasting during chronic *Trypanosoma brucei* infection. 2023.03.01.530674  
1092 Preprint at <https://doi.org/10.1101/2023.03.01.530674> (2023).
- 1093 18. Chusyd, D. E., Wang, D., Huffman, D. M. & Nagy, T. R. Relationships between  
1094 Rodent White Adipose Fat Pads and Human White Adipose Fat Depots. *Front*  
1095 *Nutr* **3**, 10 (2016).
- 1096 19. Choe, S. S., Huh, J. Y., Hwang, I. J., Kim, J. I. & Kim, J. B. Adipose Tissue  
1097 Remodeling: Its Role in Energy Metabolism and Metabolic Disorders. *Front*  
1098 *Endocrinol (Lausanne)* **7**, 30 (2016).



- 1099 20. Rajbhandari, P. *et al.* Single cell analysis reveals immune cell–adipocyte  
1100 crosstalk regulating the transcription of thermogenic adipocytes. *eLife* **8**, e49501.
- 1101 21. Goepfert, A., Lehmann, S., Wirth, E. & Rondeau, J.-M. The human IL-17A/F  
1102 heterodimer: a two-faced cytokine with unique receptor recognition properties.  
1103 *Sci Rep* **7**, 8906 (2017).
- 1104 22. Dahlman, I. *et al.* Adipose tissue pathways involved in weight loss of cancer  
1105 cachexia. *Br J Cancer* **102**, 1541–1548 (2010).
- 1106 23. Aviello, G., Cristiano, C., Luckman, S. M. & D’Agostino, G. Brain control of  
1107 appetite during sickness. *British Journal of Pharmacology* **178**, 2096–2110  
1108 (2021).
- 1109 24. Sun, X. *et al.* Fat Wasting Is Damaging: Role of Adipose Tissue in Cancer-  
1110 Associated Cachexia. *Front Cell Dev Biol* **8**, 33 (2020).
- 1111 25. Duncan, R. E., Ahmadian, M., Jaworski, K., Sarkadi-Nagy, E. & Sul, H. S.  
1112 Regulation of Lipolysis in Adipocytes. *Annu Rev Nutr* **27**, 79–101 (2007).
- 1113 26. Enerbäck, S. *et al.* Mice lacking mitochondrial uncoupling protein are cold-  
1114 sensitive but not obese. *Nature* **387**, 90–94 (1997).
- 1115 27. Ikeda, K. *et al.* UCP1-independent signaling involving SERCA2b-mediated  
1116 calcium cycling regulates beige fat thermogenesis and systemic glucose  
1117 homeostasis. *Nat Med* **23**, 1454–1465 (2017).
- 1118 28. Ganeshan, K. *et al.* Energetic Trade-Offs and Hypometabolic States Promote  
1119 Disease Tolerance. *Cell* **177**, 399-413.e12 (2019).
- 1120 29. Haas, J. D. *et al.* Development of Interleukin-17-Producing  $\gamma\delta$  T Cells Is  
1121 Restricted to a Functional Embryonic Wave. *Immunity* **37**, 48–59 (2012).
- 1122 30. Nogueira, G. *et al.* Interleukin-17 acts in the hypothalamus reducing food intake.  
1123 *Brain, Behavior, and Immunity* **87**, 272–285 (2020).

- 1124 31. Emont, M. P. *et al.* A single-cell atlas of human and mouse white adipose tissue.  
1125 *Nature* **603**, 926–933 (2022).
- 1126 32. Merrick, D. *et al.* Identification of a mesenchymal progenitor cell hierarchy in  
1127 adipose tissue. *Science* **364**, eaav2501 (2019).
- 1128 33. Schwalie, P. C. *et al.* A stromal cell population that inhibits adipogenesis in  
1129 mammalian fat depots. *Nature* **559**, 103–108 (2018).
- 1130 34. Baardman, J. *et al.* A Defective Pentose Phosphate Pathway Reduces  
1131 Inflammatory Macrophage Responses during Hypercholesterolemia. *Cell Reports*  
1132 **25**, 2044-2052.e5 (2018).
- 1133 35. Kang, S. *et al.* Regulation of Early Adipose Commitment by Zfp521. *PLOS*  
1134 *Biology* **10**, e1001433 (2012).
- 1135 36. Beaver, A. K. *et al.* Extravascular spaces are the primary reservoir of antigenic  
1136 diversity in *Trypanosoma brucei* infection. 2022.06.27.497797 Preprint at  
1137 <https://doi.org/10.1101/2022.06.27.497797> (2023).
- 1138 37. Carvalho, T. *et al.* *Trypanosoma brucei* triggers a marked immune response in  
1139 male reproductive organs. *PLoS Negl Trop Dis* **12**, e0006690 (2018).
- 1140 38. Raheem, K. A. A Review of Trypanosomosis-Induced Reproductive Dysfunctions  
1141 in Male Animals. *Agrosearch* **14**, 30–38 (2014).
- 1142 39. Vale, P. F. & Jardine, M. D. Sex-specific behavioural symptoms of viral gut  
1143 infection and *Wolbachia* in *Drosophila melanogaster*. *J Insect Physiol* **82**, 28–32  
1144 (2015).
- 1145 40. Cernetich, A. *et al.* Involvement of gonadal steroids and gamma interferon in sex  
1146 differences in response to blood-stage malaria infection. *Infect Immun* **74**, 3190–  
1147 3203 (2006).

- 1148 41. Klein, S. L. & Flanagan, K. L. Sex differences in immune responses. *Nat Rev*  
1149 *Immunol* **16**, 626–638 (2016).
- 1150 42. Uranga, A. P., Levine, J. & Jensen, M. Isotope tracer measures of meal fatty acid  
1151 metabolism: reproducibility and effects of the menstrual cycle. *Am J Physiol*  
1152 *Endocrinol Metab* **288**, E547-555 (2005).
- 1153 43. Jansson, P. A., Larsson, A., Smith, U. & Lönnroth, P. Glycerol production in  
1154 subcutaneous adipose tissue in lean and obese humans. *J Clin Invest* **89**, 1610–  
1155 1617 (1992).
- 1156 44. Kosteli, A. *et al.* Weight loss and lipolysis promote a dynamic immune response  
1157 in murine adipose tissue. *J Clin Invest* **120**, 3466–3479 (2010).
- 1158 45. Ioan-Facsinay, A. *et al.* Adipocyte-derived lipids modulate CD4+ T-cell function.  
1159 *Eur J Immunol* **43**, 1578–1587 (2013).
- 1160 46. Shi, L. *et al.* Infection with *Mycobacterium tuberculosis* induces the Warburg  
1161 effect in mouse lungs. *Sci Rep* **5**, 18176 (2015).
- 1162 47. Soto-Herero, G., Gómez de Las Heras, M. M., Gabandé-Rodríguez, E., Oller,  
1163 J. & Mittelbrunn, M. Glycolysis - a key player in the inflammatory response. *FEBS*  
1164 *J* **287**, 3350–3369 (2020).
- 1165 48. Xiao, Y., Liu, D., Cline, M. A. & Gilbert, E. R. Chronic stress and adipose tissue in  
1166 the anorexic state: endocrine and epigenetic mechanisms. *Adipocyte* **9**, 472–483  
1167 (2020).
- 1168 49. Teijeiro, A., Garrido, A., Ferre, A., Perna, C. & Djouder, N. Inhibition of the IL-17A  
1169 axis in adipocytes suppresses diet-induced obesity and metabolic disorders in  
1170 mice. *Nat Metab* **3**, 496–512 (2021).
- 1171 50. Ayari, A. *et al.* Influenza infection rewires energy metabolism and induces  
1172 browning features in adipose cells and tissues. *Commun Biol* **3**, 1–15 (2020).

- 1173 51. Kuestner, R. E. *et al.* Identification of the IL-17 Receptor Related Molecule IL-  
1174 17RC as the Receptor for IL-17F. *J Immunol* **179**, 5462–5473 (2007).
- 1175 52. Machado, H., Hofer, P., Zechner, R. & Figueiredo, L. M. Adipocyte lipolysis  
1176 protects the host against *Trypanosoma brucei* infection. 2022.11.05.515274  
1177 Preprint at <https://doi.org/10.1101/2022.11.05.515274> (2022).
- 1178 53. Herbert, W. J. & Lumsden, W. H. R. *Trypanosoma brucei*: A rapid “matching”  
1179 method for estimating the host’s parasitemia. *Experimental Parasitology* **40**, 427–  
1180 431 (1976).
- 1181 54. Ilboudo, H. *et al.* Introducing the TrypanoGEN biobank: A valuable resource for  
1182 the elimination of human African trypanosomiasis. *PLOS Neglected Tropical*  
1183 *Diseases* **11**, e0005438 (2017).
- 1184 55. Le Ray, D., Barry, J. D., Easton, C. & Vickerman, K. First tsetse fly transmission  
1185 of the ‘AnTat’ serodeme of *Trypanosoma brucei*. *Ann Soc Belg Med Trop* **57**,  
1186 369–381 (1977).
- 1187 56. Bankhead, P. *et al.* QuPath: Open source software for digital pathology image  
1188 analysis. *Sci Rep* **7**, 16878 (2017).
- 1189 57. Schindelin, J. *et al.* Fiji: an open-source platform for biological-image analysis.  
1190 *Nat Methods* **9**, 676–682 (2012).
- 1191
- 1192

**Figure 1**

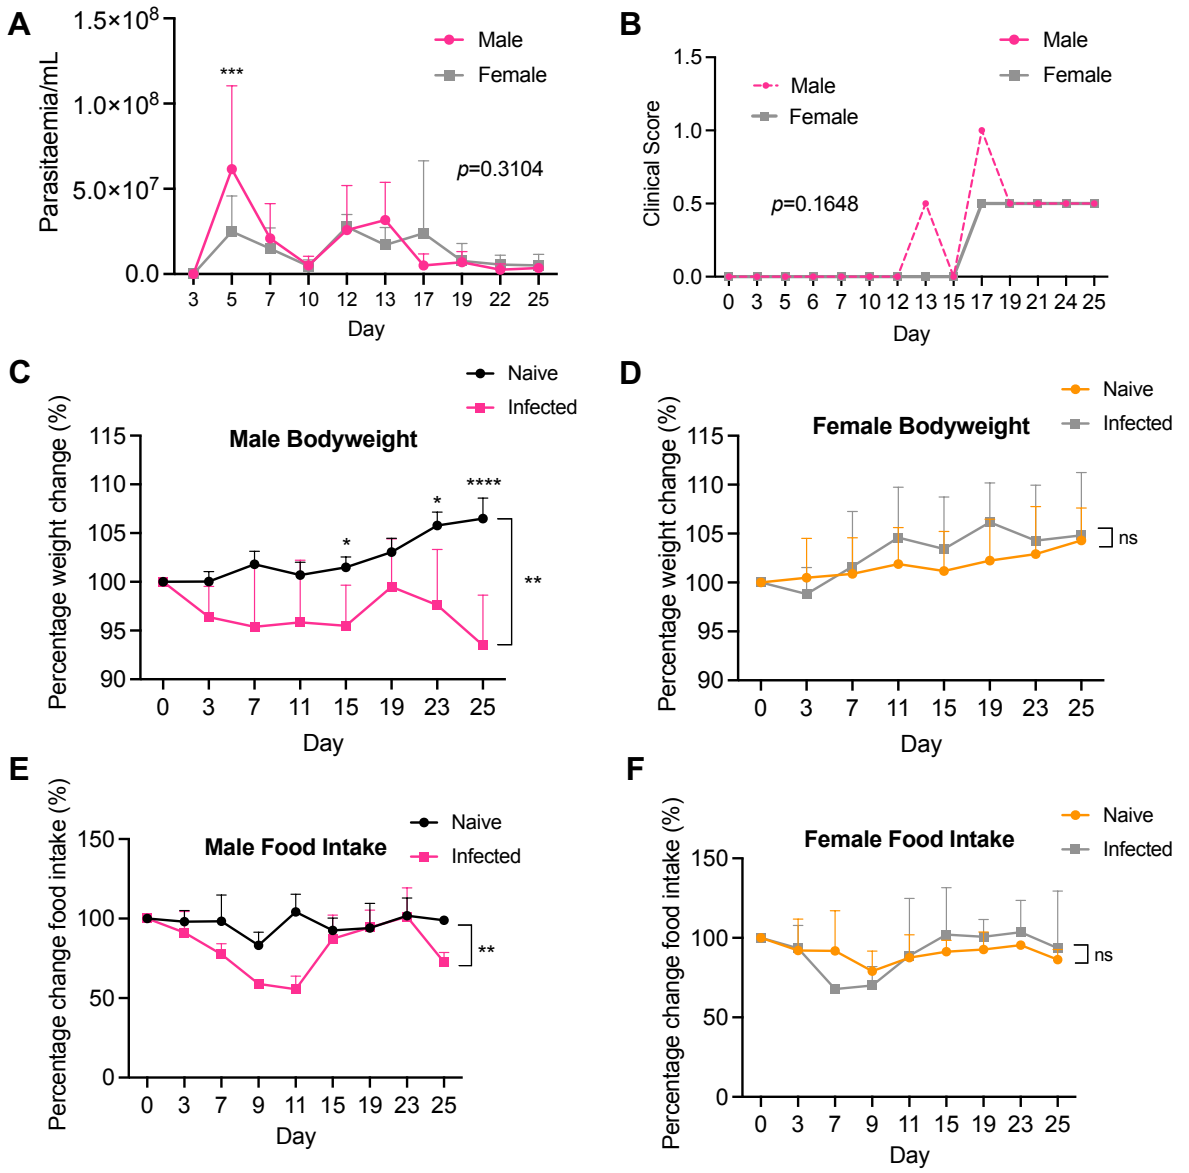

**Figure 2**

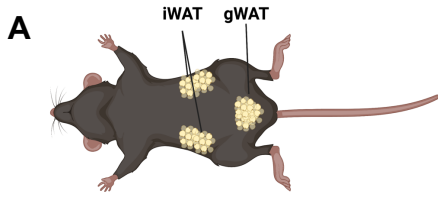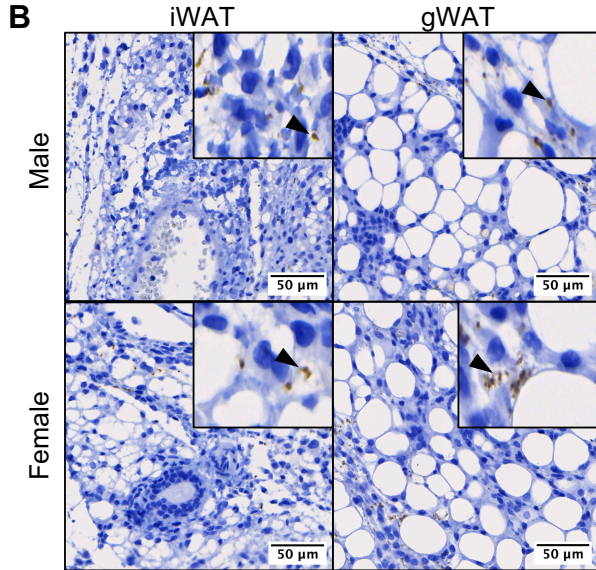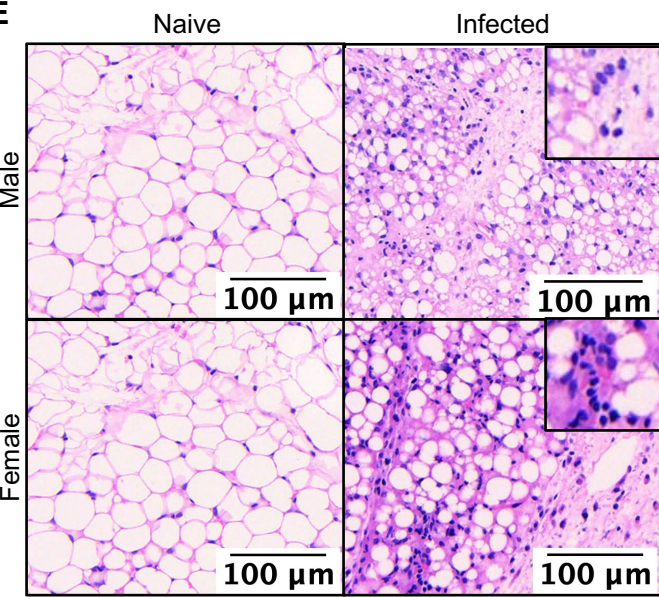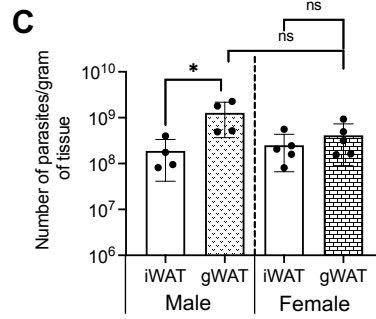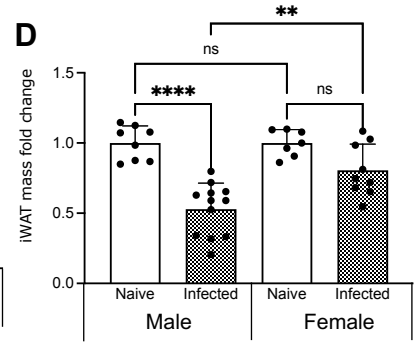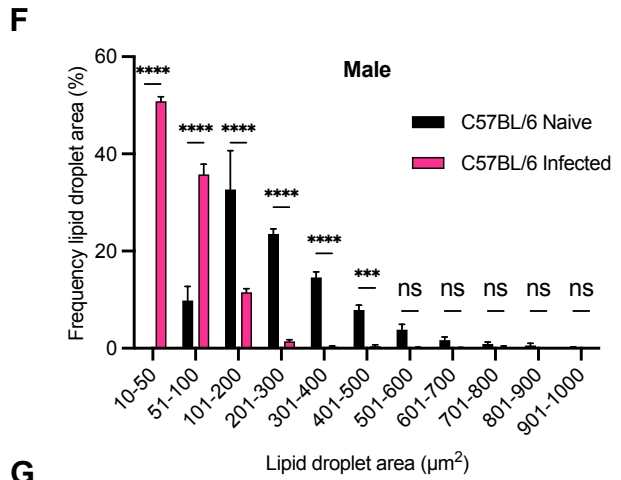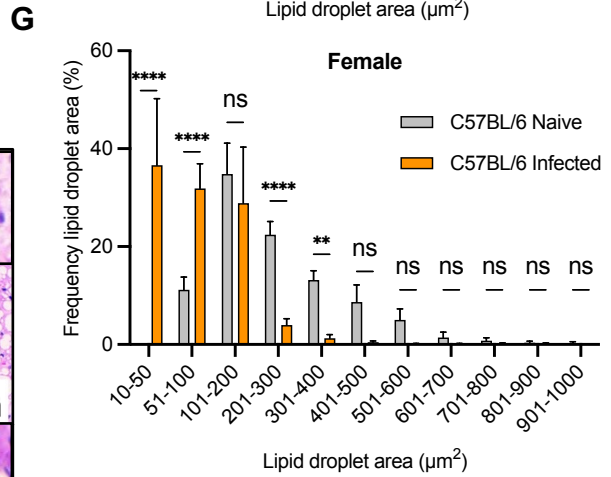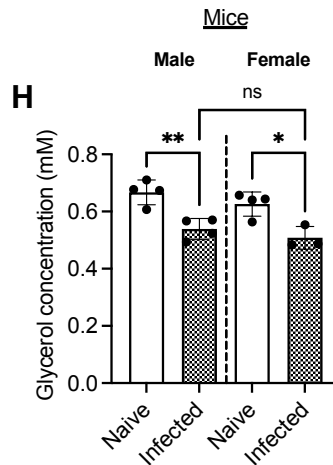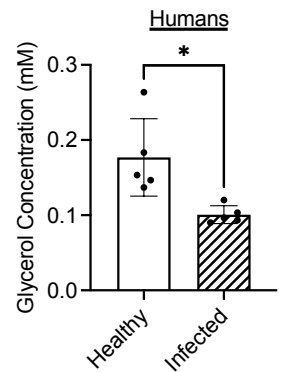

**Figure 3**

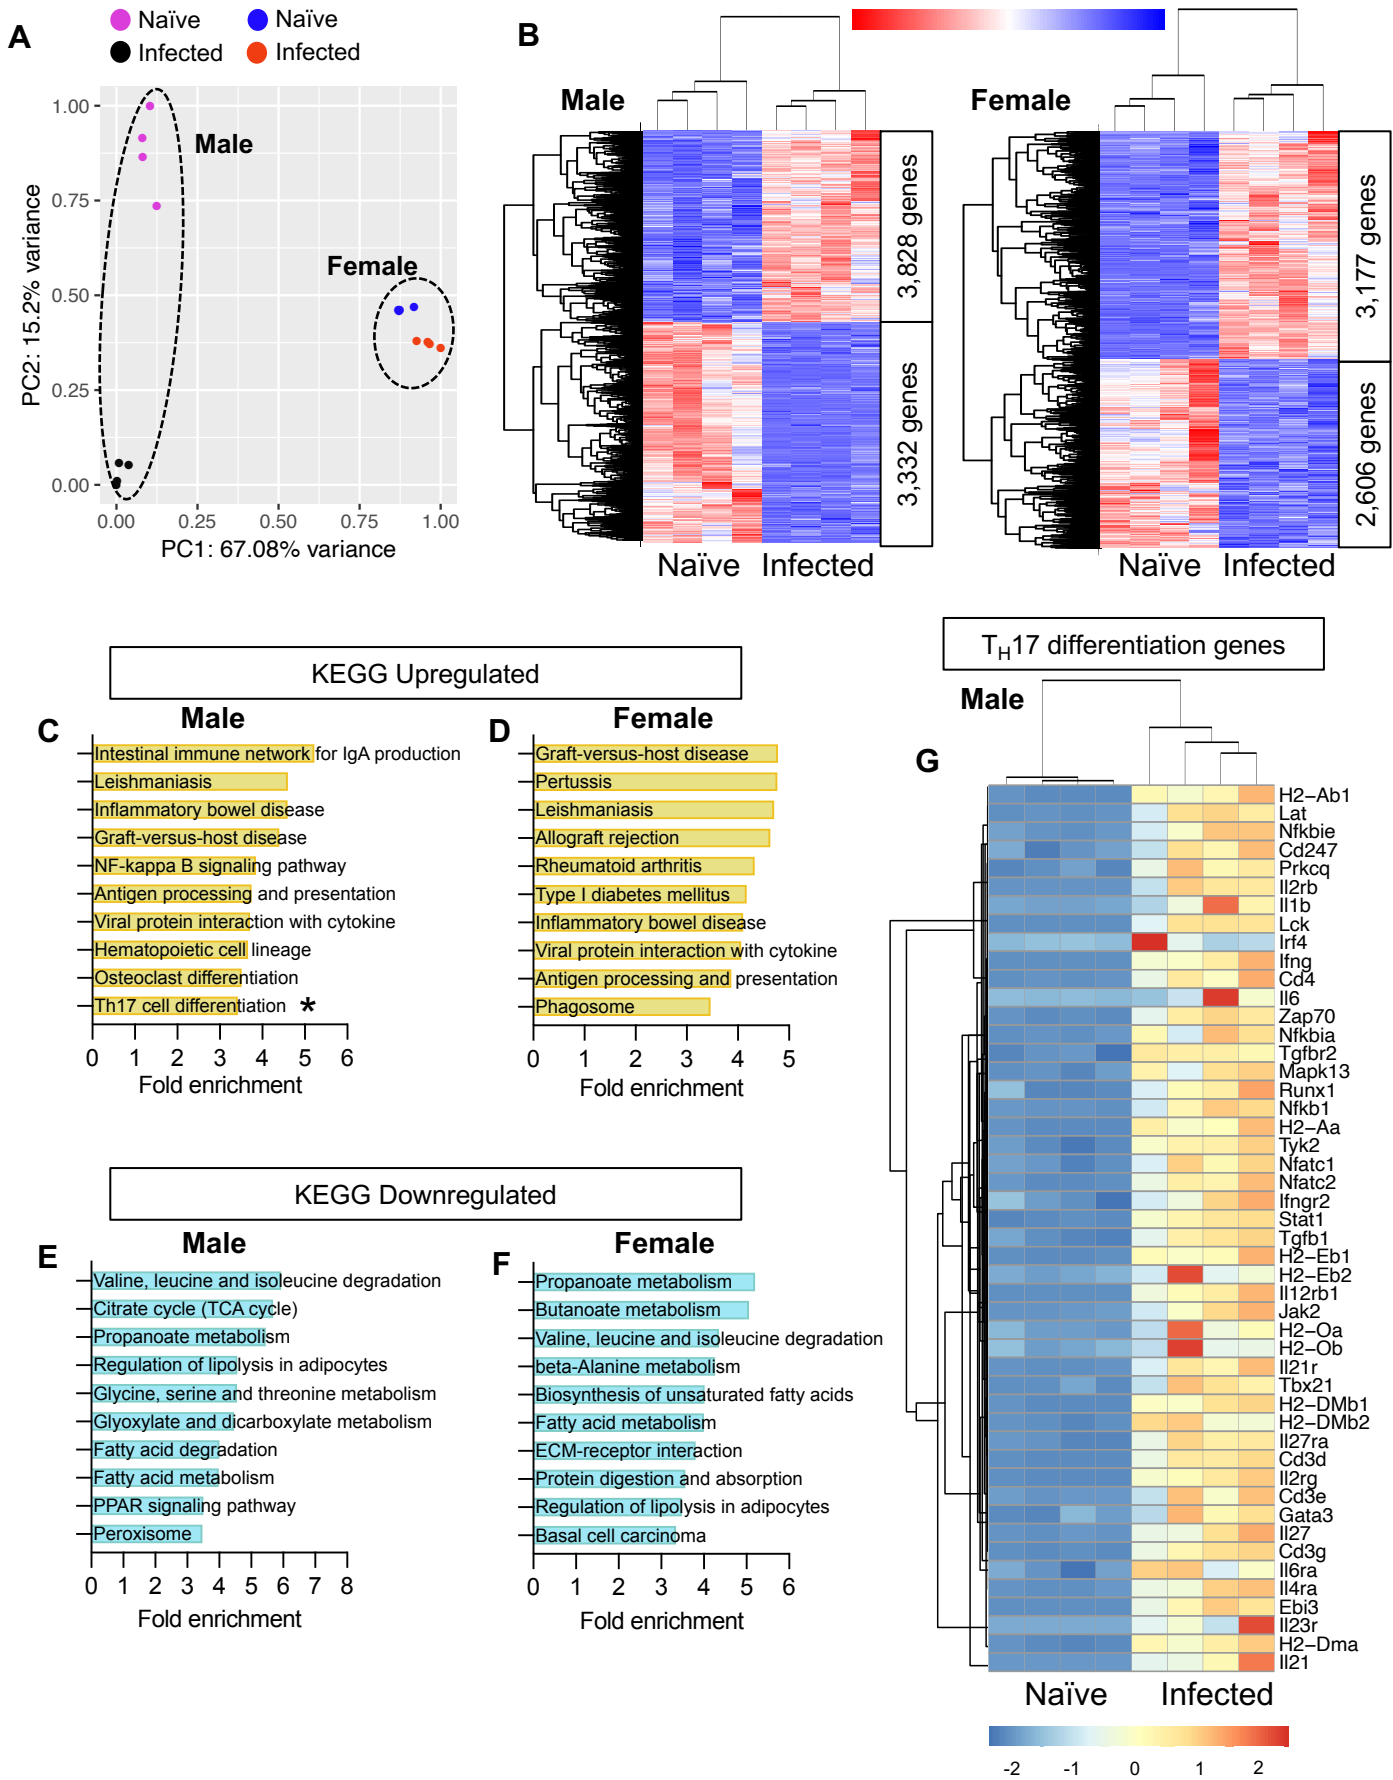

**Figure 4**

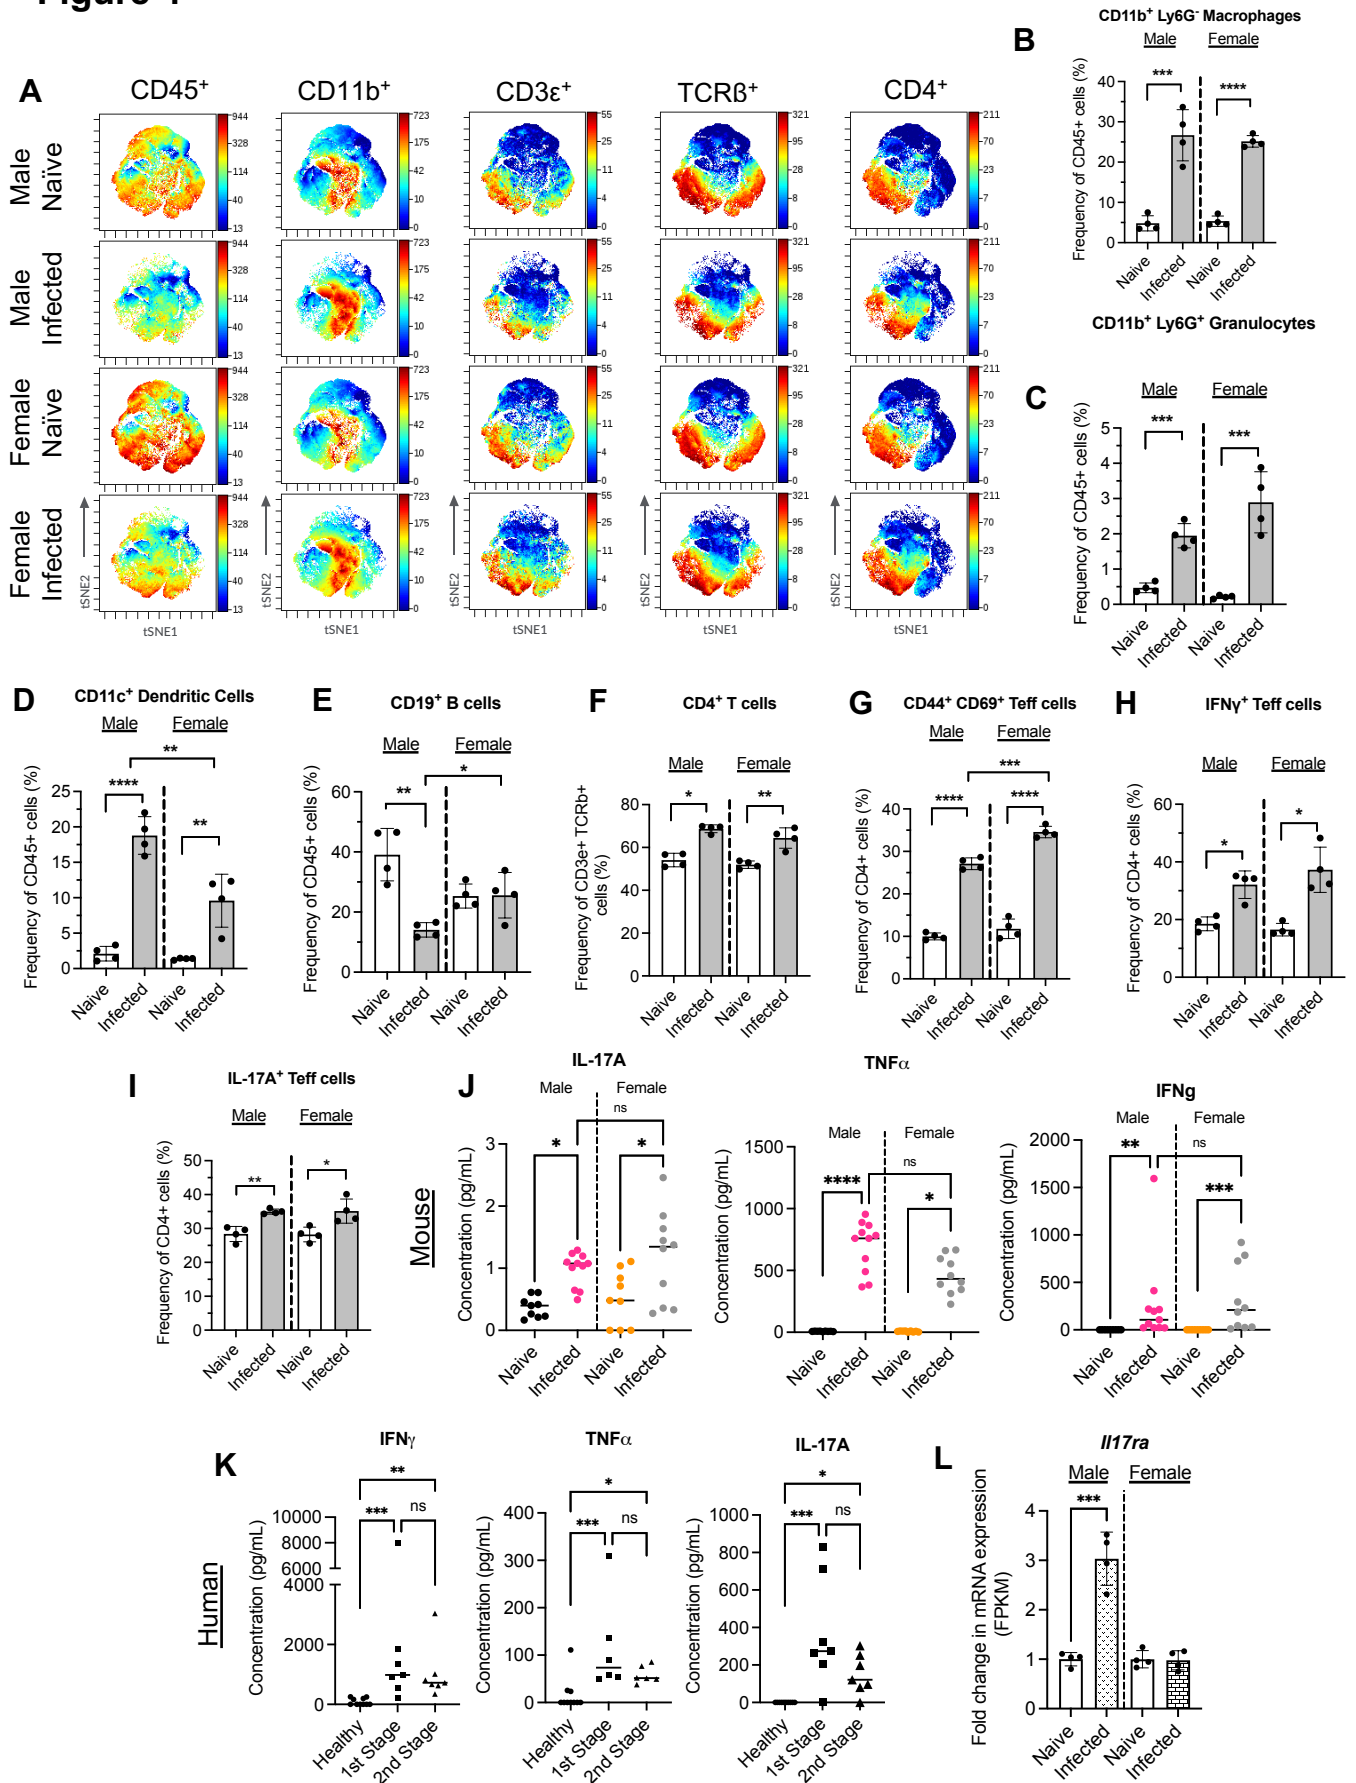





**Figure 6**

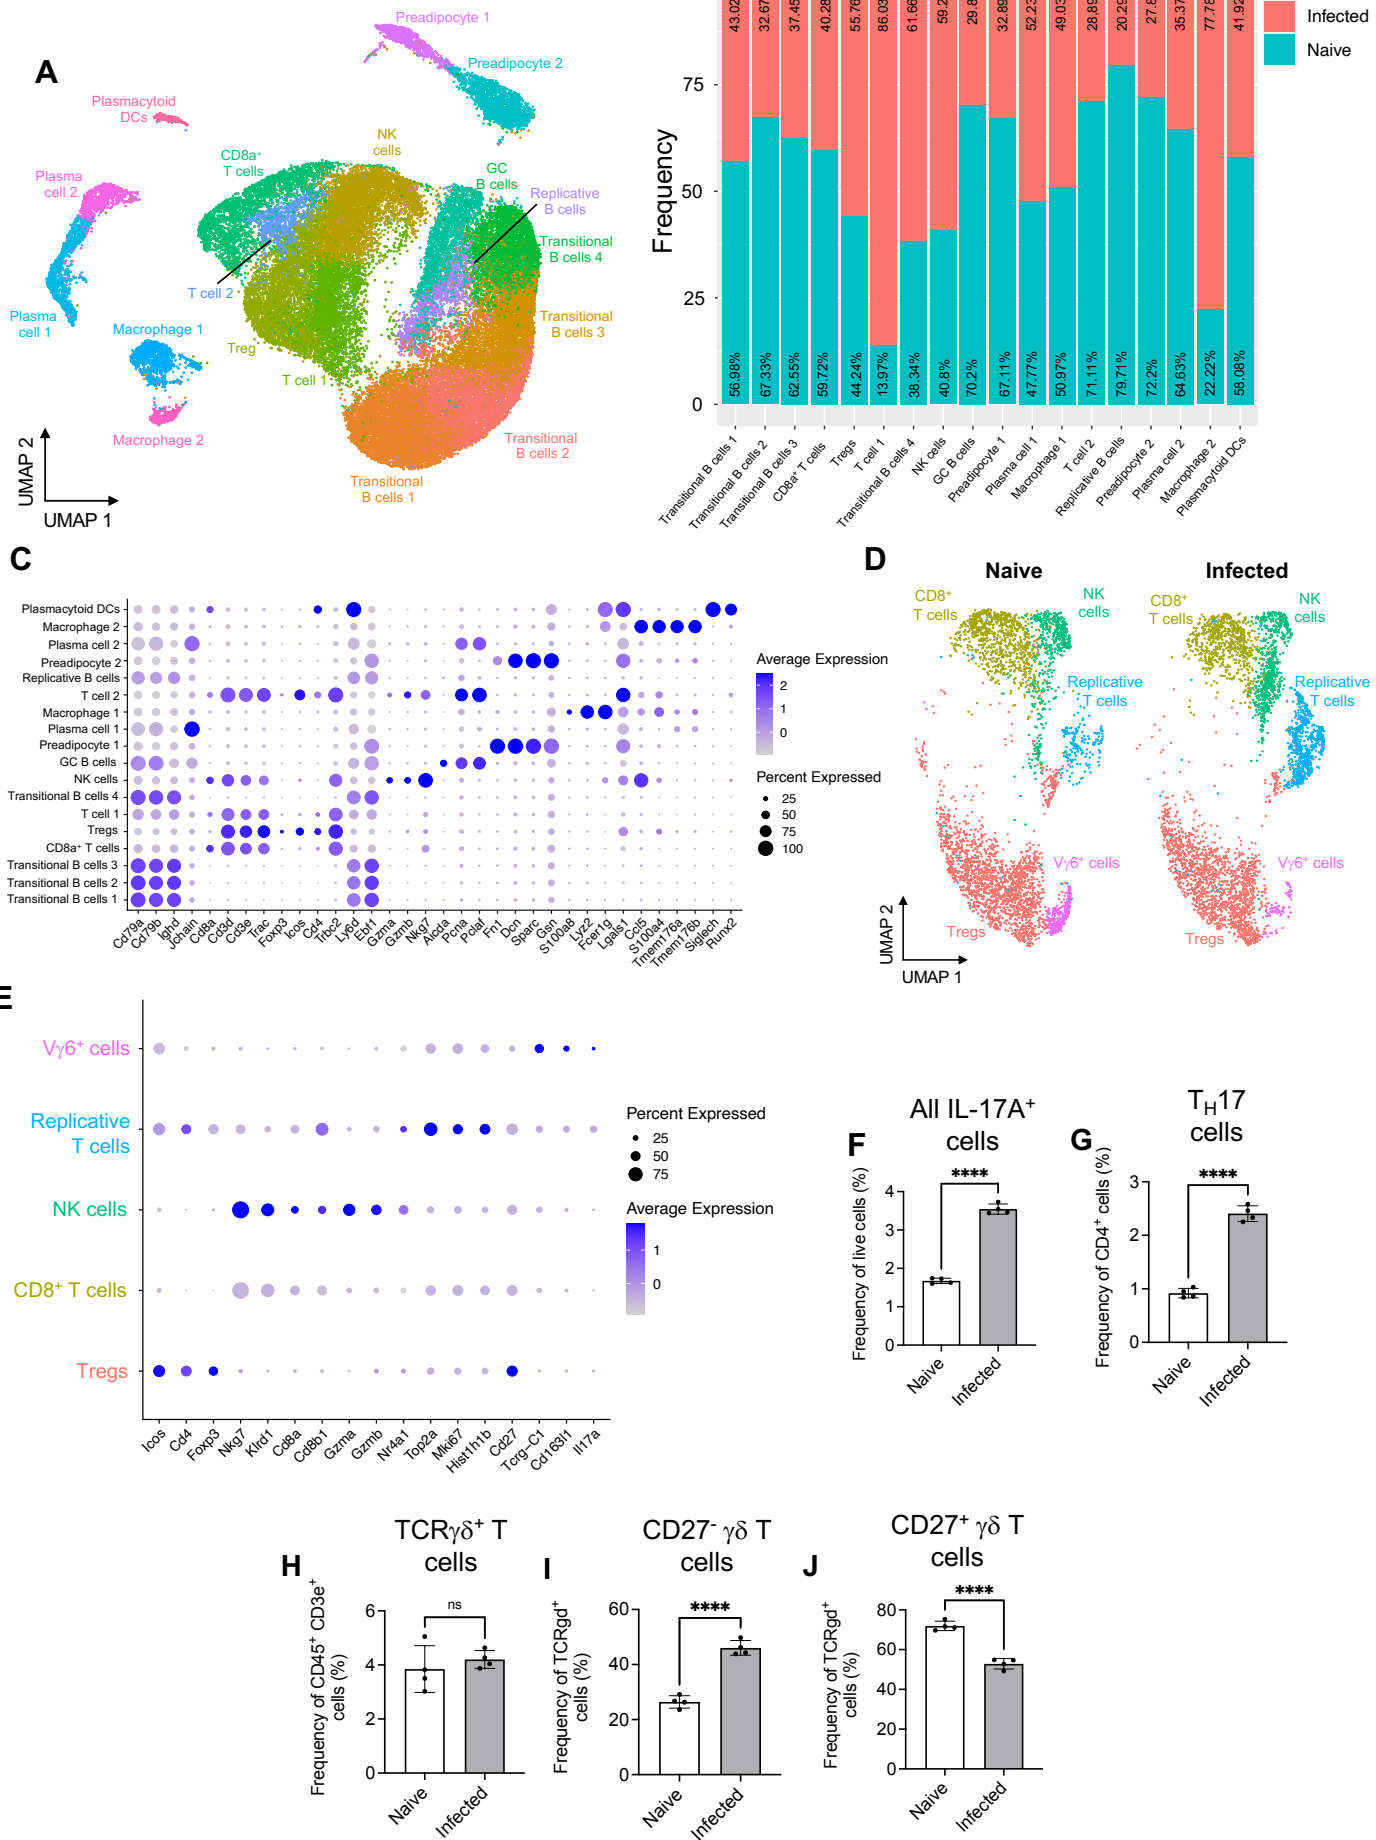

**Figure 7**

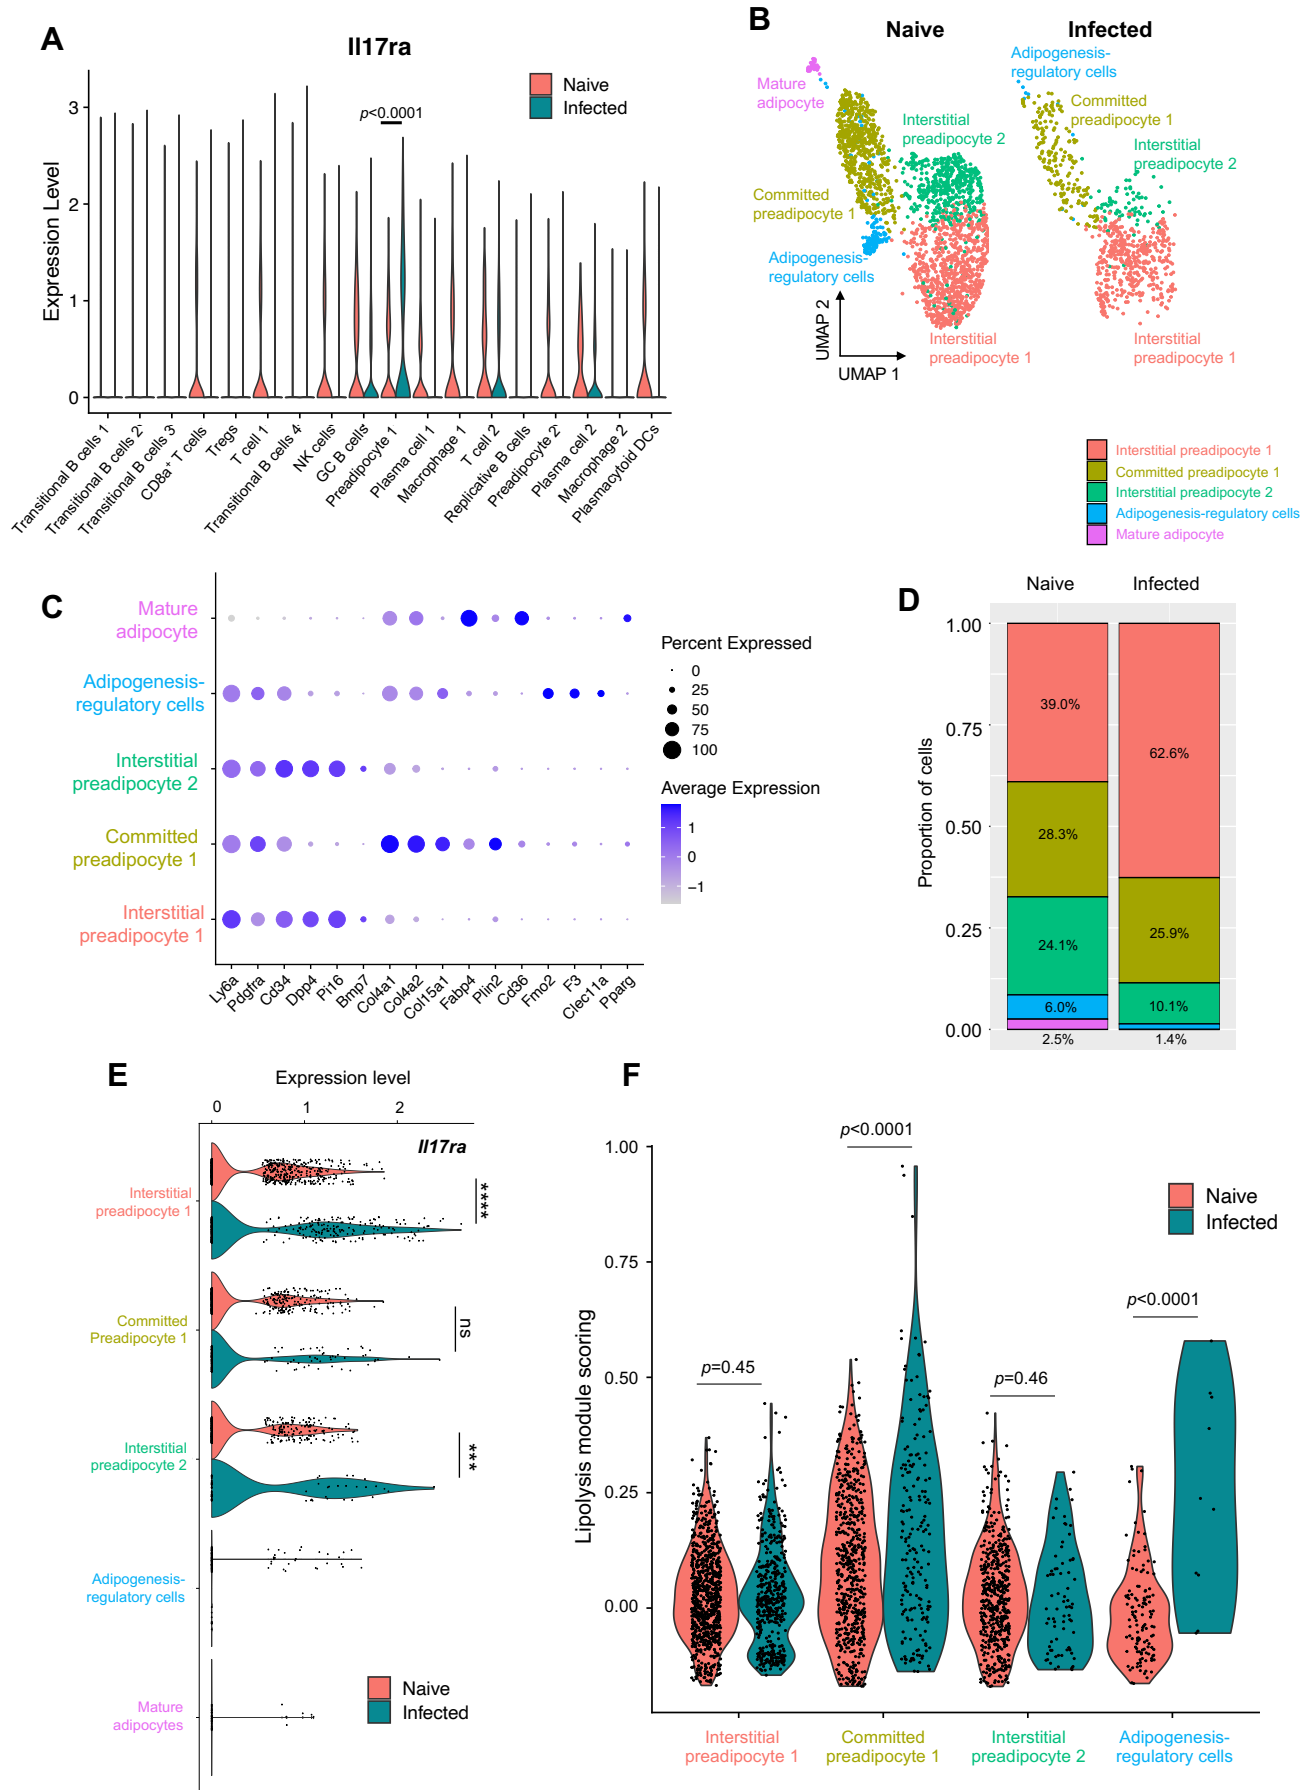

**Figure 8**

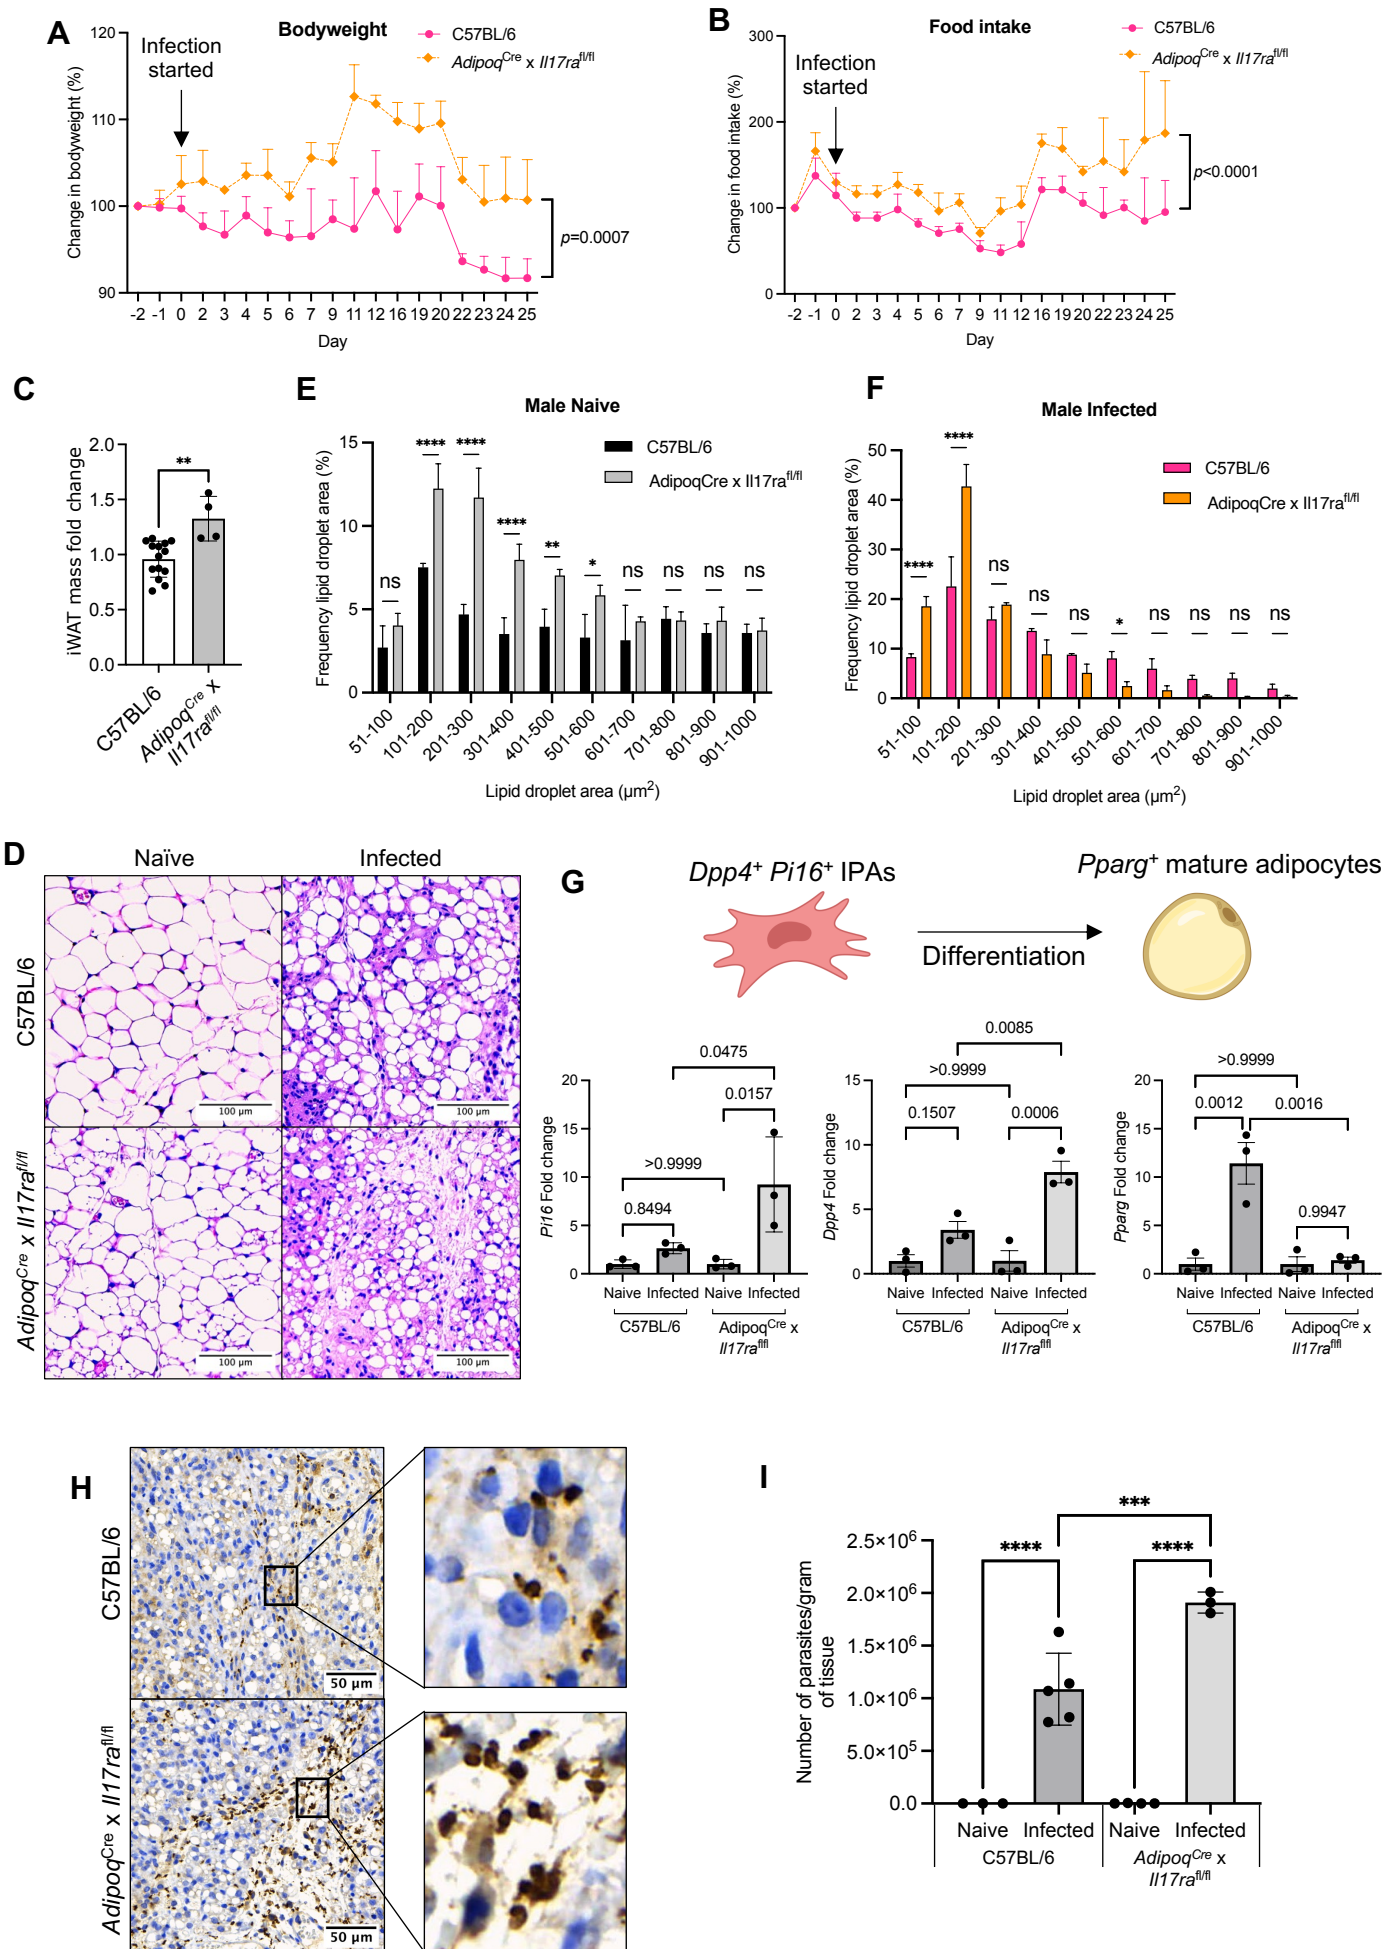

Source: https://www.biorxiv.org/content/10.1101/2022.09.23.509158v3.full.pdf
